# Supplementary material for: Linker-dependent control of the chiroptical properties of polymethylene-vaulted trans-bis[(β-iminomethyl)naphthoxy]platinum(ii) complexes
Source: Royal Society of Chemistry journal article supplement (doi:10.1039/d4dt00273c), 2024-01-01
Supplement: d4dt00273c1.pdf [file d4dt00273c1.pdf]

## Supporting Information

### Linker-dependent control of the chiroptical properties of polymethylene-vaulted *trans*-Bis[( $\beta$ -iminomethyl)naphthoxy]platinum(II) complexes

Masahiro Ikeshita<sup>a,b\*</sup>, Shing Cho Ma<sup>c</sup>, Gilles, Muller<sup>c\*</sup>, Takeshi Naota<sup>a\*</sup>

<sup>a</sup> Department of Chemistry, Graduate School of Engineering Science, Osaka University  
Machikaneyama, Toyonaka, Osaka 560-8531, Japan

<sup>b</sup> Department of Applied Molecular Chemistry, College of Industrial Technology, Nihon University, Narashino,  
Chiba 275-8575, Japan.

<sup>c</sup> Department of Chemistry, San José State University  
One Washington Square, San José, California 95192-0101, United States

## Contents

|                 |                                                                                                        |     |
|-----------------|--------------------------------------------------------------------------------------------------------|-----|
| <b>Fig. S1</b>  | <sup>1</sup> H and <sup>13</sup> C NMR spectra of ( <i>R</i> )- <b>1a</b> in CDCl <sub>3</sub> .       | S3  |
| <b>Fig. S2</b>  | <sup>1</sup> H and <sup>13</sup> C NMR spectra of ( <i>R</i> )- <b>1b</b> in CDCl <sub>3</sub> .       | S4  |
| <b>Fig. S3</b>  | <sup>1</sup> H and <sup>13</sup> C NMR spectra of ( <i>R</i> )- <b>1c</b> in CDCl <sub>3</sub> .       | S5  |
| <b>Fig. S4</b>  | <sup>1</sup> H and <sup>13</sup> C NMR spectra of ( <i>R</i> )- <b>1d</b> in CDCl <sub>3</sub> .       | S6  |
| <b>Fig. S5</b>  | <sup>1</sup> H and <sup>13</sup> C NMR spectra of ( <i>R</i> )- <b>1e</b> in CDCl <sub>3</sub> .       | S7  |
| <b>Fig. S6</b>  | <sup>1</sup> H and <sup>13</sup> C NMR spectra of ( <i>R</i> )- <b>1f</b> in CDCl <sub>3</sub> .       | S8  |
| <b>Fig. S7</b>  | Time-dependent UV absorption intensity of optical resolution of <b>1a–f</b> .                          | S9  |
| <b>Fig. S8</b>  | ORTEP representation of ( <i>R</i> )- <b>1a–f</b> as their optically pure crystals.                    | S10 |
| <b>Table S1</b> | Crystallographic data for complexes (–)- <b>1a–e</b> and (+)- <b>1f</b> .                              | S11 |
| <b>Fig. S9</b>  | CD spectra of 2.00×10 <sup>–4</sup> M solutions of <b>1a–f</b> in 2-MeTHF.                             | S12 |
| <b>Fig. S10</b> | Anisotropy factor <i>g</i> values of CD spectra for <b>1a–f</b> in 2-MeTHF.                            | S13 |
| <b>Fig. S11</b> | Photographs of ( <i>R</i> )- <b>1a–f</b> in 2-MeTHF under UV irradiation.                              | S14 |
| <b>Fig. S12</b> | Emission spectra for ( <i>R</i> )- <b>1a–f</b> in 2-MeTHF solution state.                              | S15 |
| <b>Table S2</b> | Photophysical data of <b>1a–f</b> in 2-MeTHF.                                                          | S16 |
| <b>Fig. S13</b> | Emission decay curves for ( <i>R</i> )- <b>1a–f</b> in 2-MeTHF solution state at 298 K.                | S17 |
| <b>Fig. S14</b> | Emission decay curves for ( <i>R</i> )- <b>1a–f</b> in 2-MeTHF solution state at 77 K.                 | S18 |
| <b>Fig. S15</b> | CPL and total emission spectra of 2.0 × 10 <sup>–4</sup> M solutions of <b>1a</b> in 2-MeTHF at 298 K. | S19 |
| <b>Fig. S16</b> | Optimized molecular structures of ( <i>R</i> )- <b>1a–f</b> in the T <sub>1</sub> state.               | S20 |

|                                                                                                                                                                          |     |
|--------------------------------------------------------------------------------------------------------------------------------------------------------------------------|-----|
| <b>Fig. S17</b> Relationship between linker length and distortion of coordination site for ( <i>R</i> )- <b>1a–f</b> in the T <sub>1</sub> state.                        | S20 |
| <b>Fig. S18</b> Frontier orbitals and their eigenvalues [eV] for <b>1a–f</b> in the T <sub>1</sub> state.                                                                | S21 |
| <b>Table S3</b> Selected data of TD-DFT calculations for ( <i>R</i> )- <b>1a–f</b> .                                                                                     | S21 |
| <b>Fig. S19</b> Experimental and theoretical CD spectra of ( <i>R</i> )- <b>1a–f</b> .                                                                                   | S22 |
| <b>Fig. S20</b> Effects of the C(23)–N(1)–N(2)–C(24) dihedral angles and N(1)–Pt(1)–N(2) angles on total energies of <b>2</b> estimated using DFT calculations.          | S22 |
| <b>Fig. S21</b> Effects of N(1)–Pt(1)–N(2) angles on geometry index ( $\tau_4$ ) of <b>2</b> estimated using DFT calculations.                                           | S22 |
| <b>Fig. S22</b> Optimized molecular structures of ( <i>R</i> )- <b>1d–f</b> in the S <sub>0</sub> state.                                                                 | S23 |
| <b>Table S4.</b> Relative energies of various conformations of ( <i>R</i> )- <b>1d–f</b> and transition dipole moments in the S <sub>0</sub> →S <sub>1</sub> transition. | S24 |
| <b>Table S5</b> Cartesian coordinates (in angstrom) of ( <i>R</i> )- <b>1a</b> in the S <sub>0</sub> state.                                                              | S25 |
| <b>Table S6</b> Cartesian coordinates (in angstrom) of ( <i>R</i> )- <b>1b</b> in the S <sub>0</sub> state.                                                              | S27 |
| <b>Table S7</b> Cartesian coordinates (in angstrom) of ( <i>R</i> )- <b>1c</b> in the S <sub>0</sub> state.                                                              | S29 |
| <b>Table S8</b> Cartesian coordinates (in angstrom) of ( <i>R</i> )- <b>1d</b> in the S <sub>0</sub> state.                                                              | S31 |
| <b>Table S9</b> Cartesian coordinates (in angstrom) of ( <i>R</i> )- <b>1e</b> in the S <sub>0</sub> state.                                                              | S34 |
| <b>Table S10</b> Cartesian coordinates (in angstrom) of ( <i>R</i> )- <b>1f</b> in the S <sub>0</sub> state.                                                             | S37 |
| <b>Table S11</b> Cartesian coordinates (in angstrom) of ( <i>R</i> )- <b>1a</b> in the T <sub>1</sub> state.                                                             | S40 |
| <b>Table S12</b> Cartesian coordinates (in angstrom) of ( <i>R</i> )- <b>1b</b> in the T <sub>1</sub> state.                                                             | S42 |
| <b>Table S13</b> Cartesian coordinates (in angstrom) of ( <i>R</i> )- <b>1c</b> in the T <sub>1</sub> state.                                                             | S44 |
| <b>Table S14</b> Cartesian coordinates (in angstrom) of ( <i>R</i> )- <b>1d</b> in the T <sub>1</sub> state.                                                             | S46 |
| <b>Table S15</b> Cartesian coordinates (in angstrom) of ( <i>R</i> )- <b>1e</b> in the T <sub>1</sub> state.                                                             | S49 |
| <b>Table S16</b> Cartesian coordinates (in angstrom) of ( <i>R</i> )- <b>1f</b> in the T <sub>1</sub> state.                                                             | S52 |

(a)

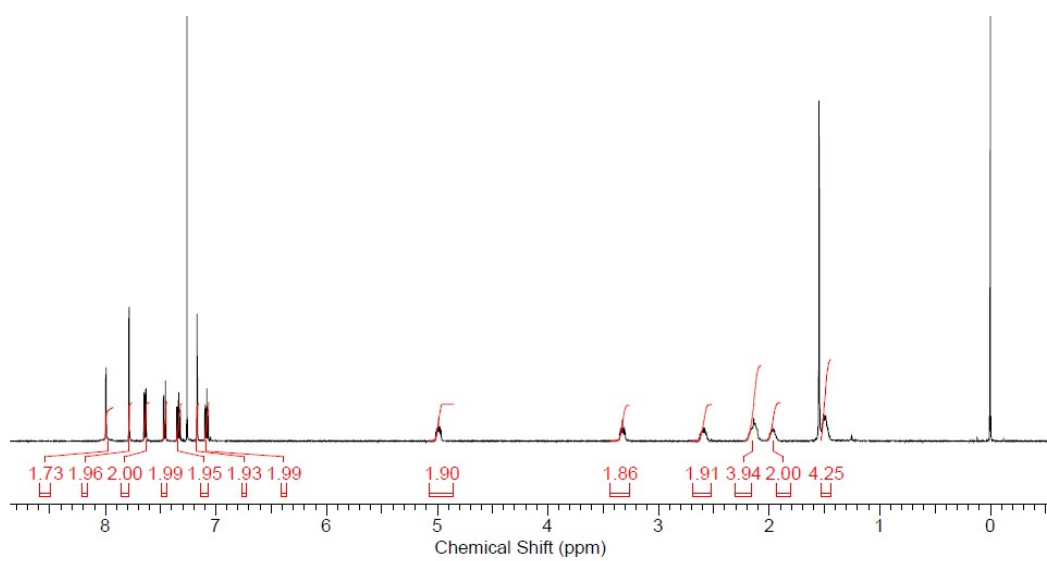

(b)

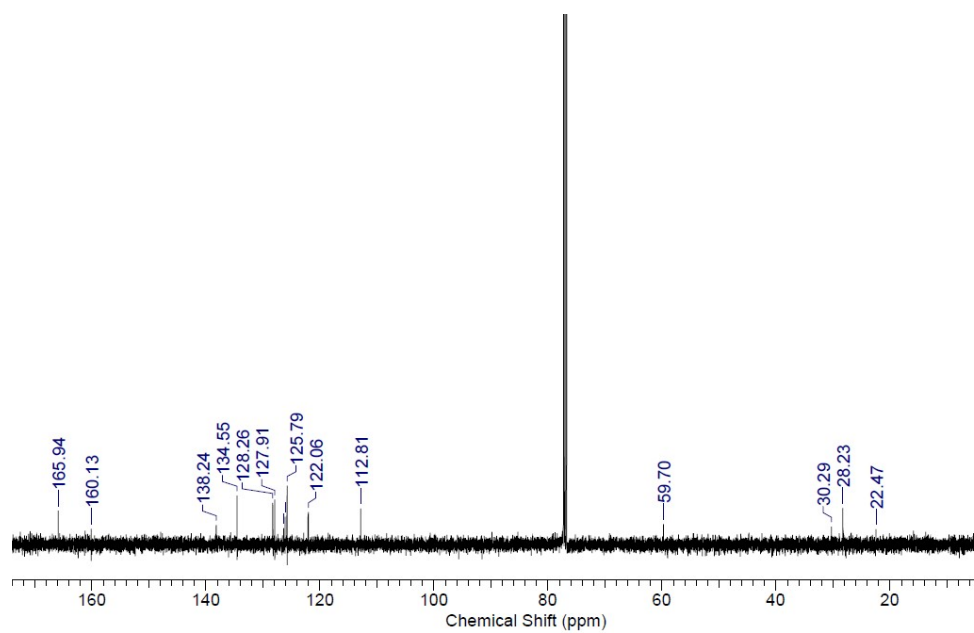

**Fig. S1.** (a)  $^1\text{H}$  and (b)  $^{13}\text{C}$  NMR spectra of (*R*)-**1a** in  $\text{CDCl}_3$ .

(a)

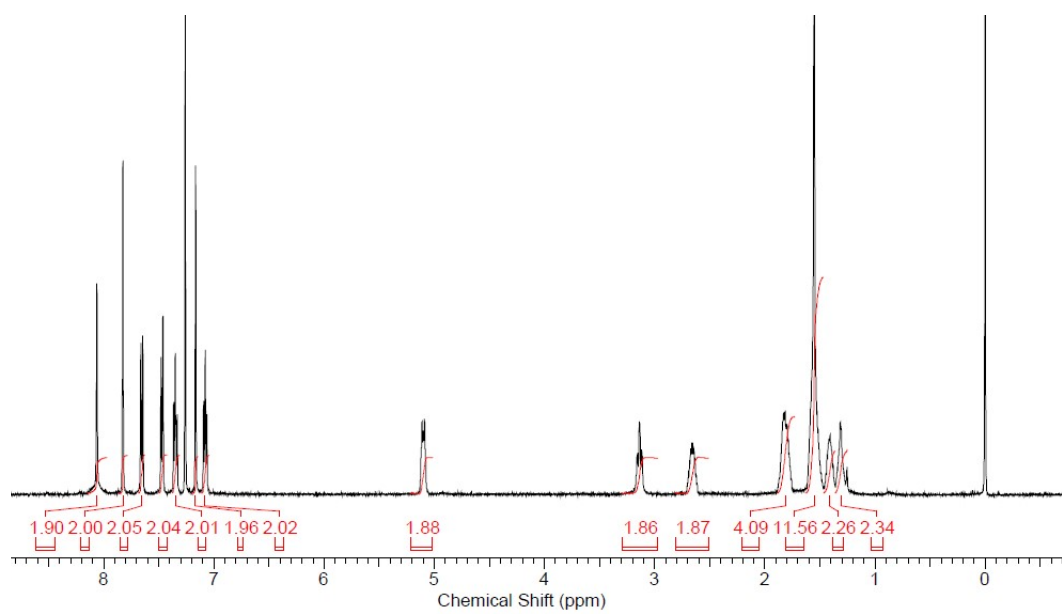

(b)

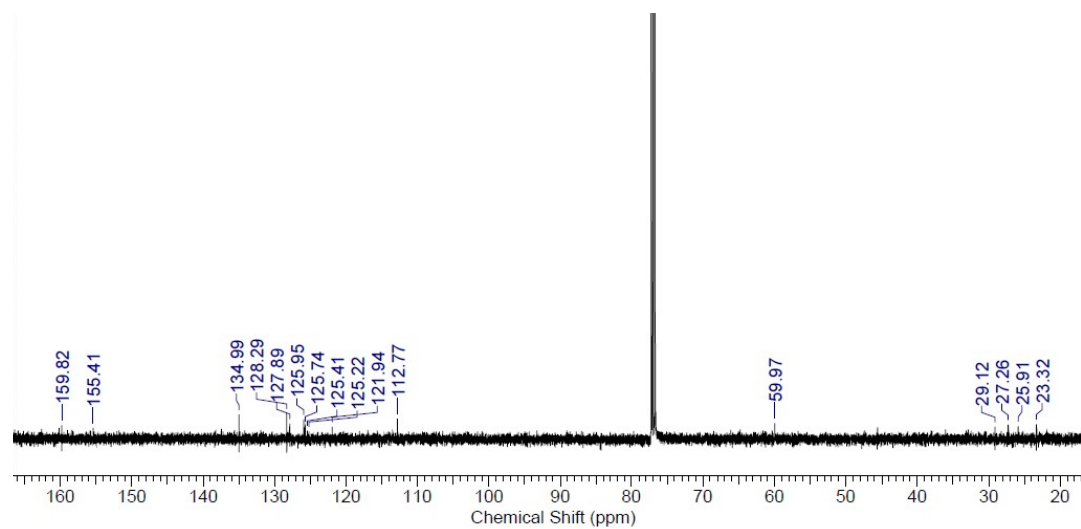

**Fig. S2.** (a)  $^1\text{H}$  and (b)  $^{13}\text{C}$  NMR spectra of (*R*)-**1b** in  $\text{CDCl}_3$ .

(a)

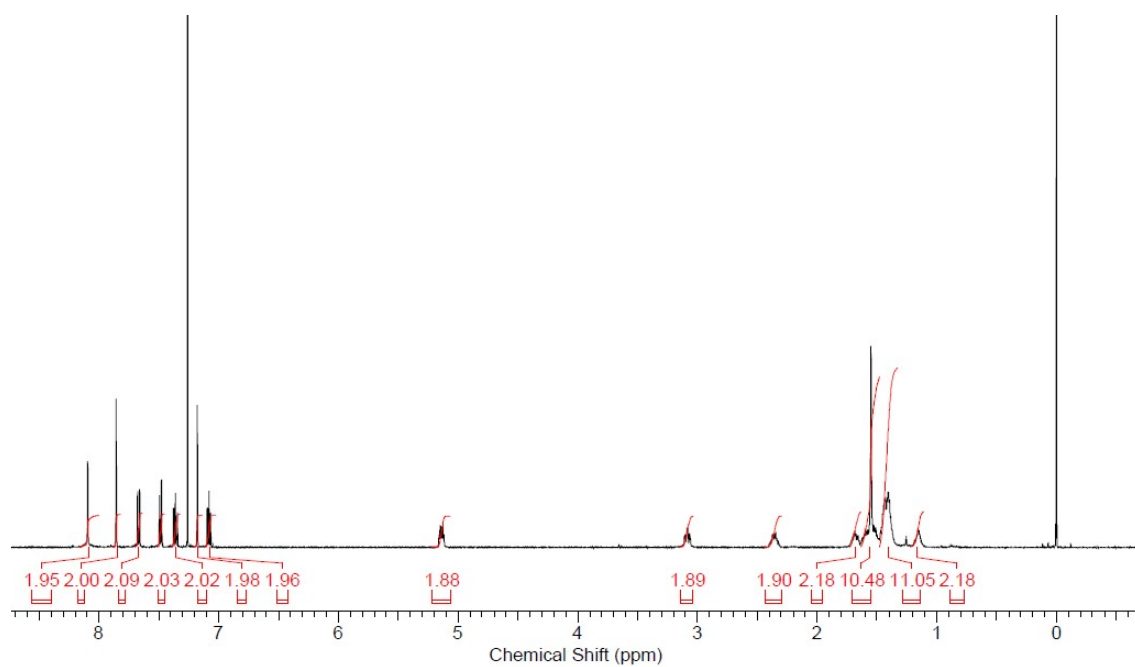

(b)

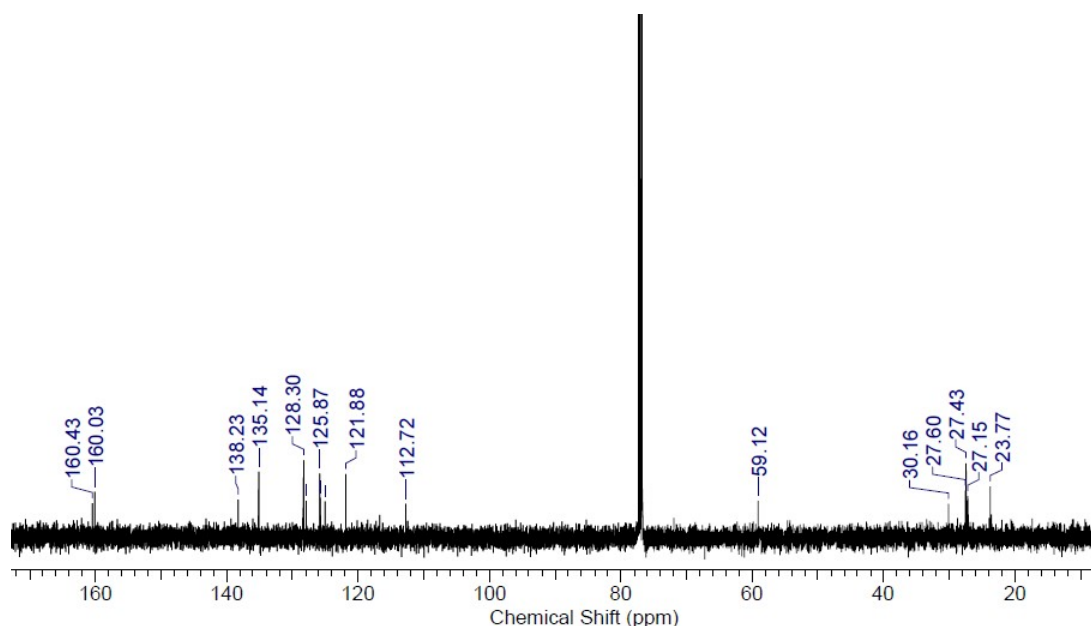

**Fig. S3.** (a) <sup>1</sup>H and (b) <sup>13</sup>C NMR spectra of (R)-1c in CDCl<sub>3</sub>.

(a)

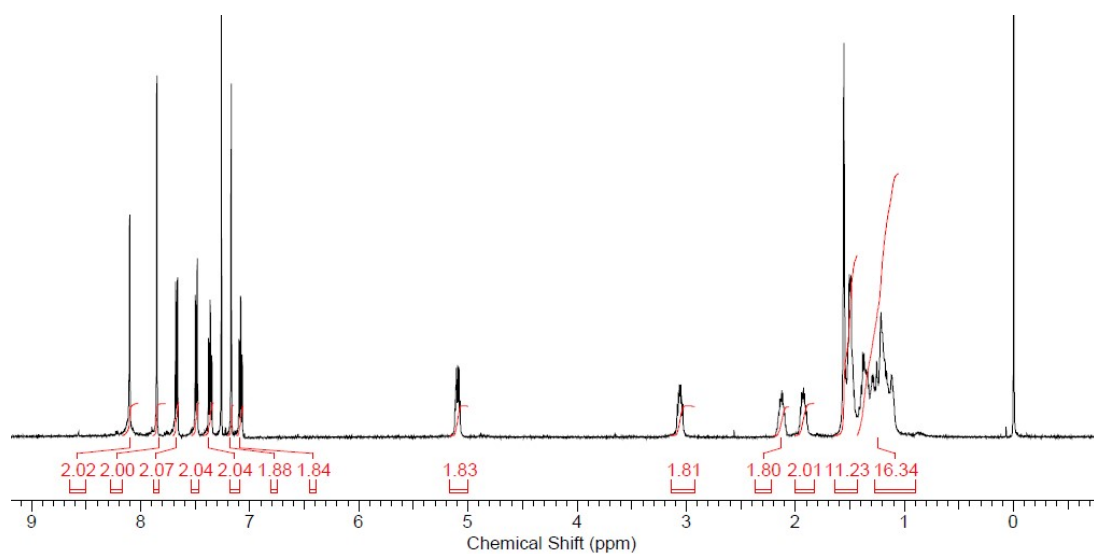

(b)

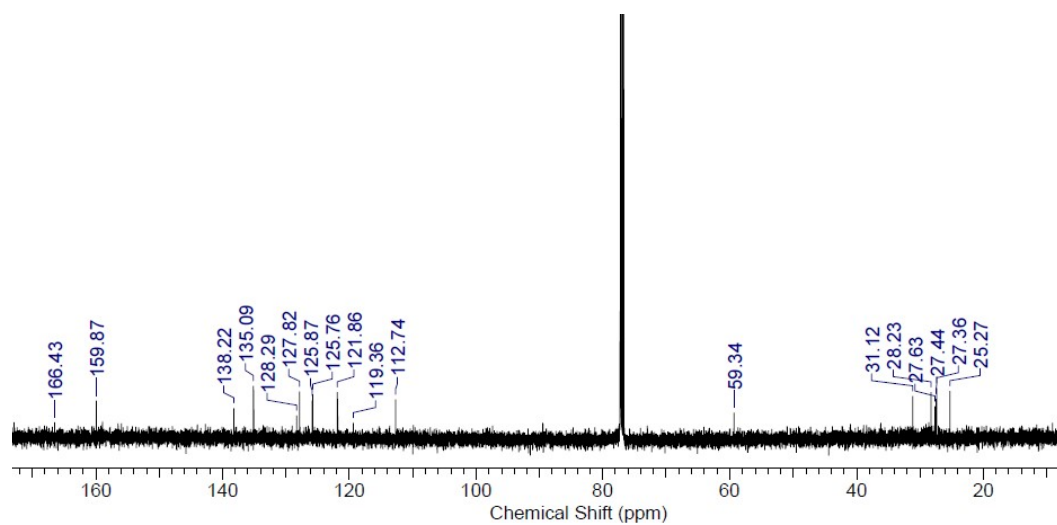

**Fig. S4.** (a)  $^1\text{H}$  and (b)  $^{13}\text{C}$  NMR spectra of (*R*)-**1d** in  $\text{CDCl}_3$ .

(a)

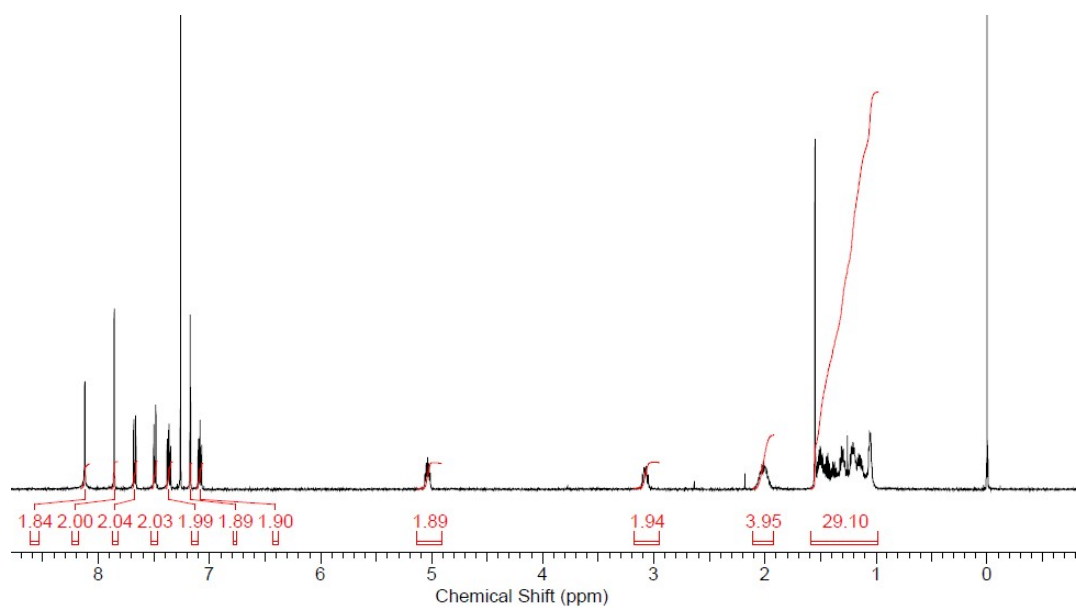

(b)

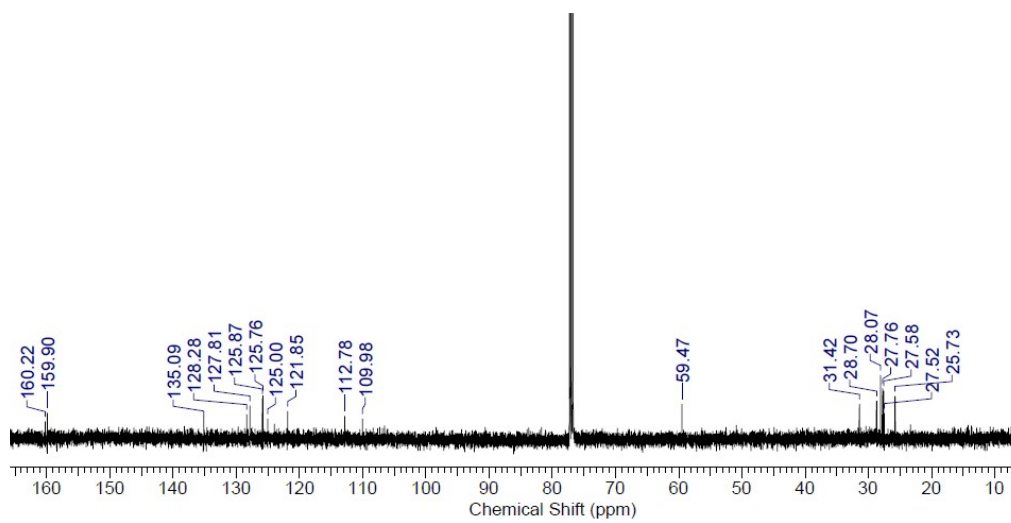

Fig. S5. (a)  $^1\text{H}$  and (b)  $^{13}\text{C}$  NMR spectra of (*R*)-**1e** in  $\text{CDCl}_3$ .

(a)

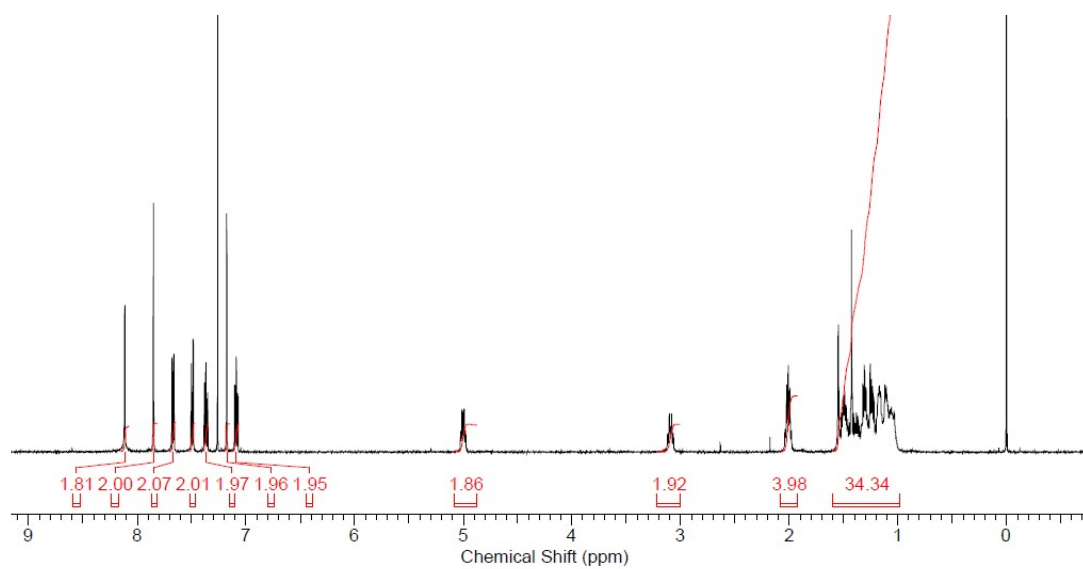

(b)

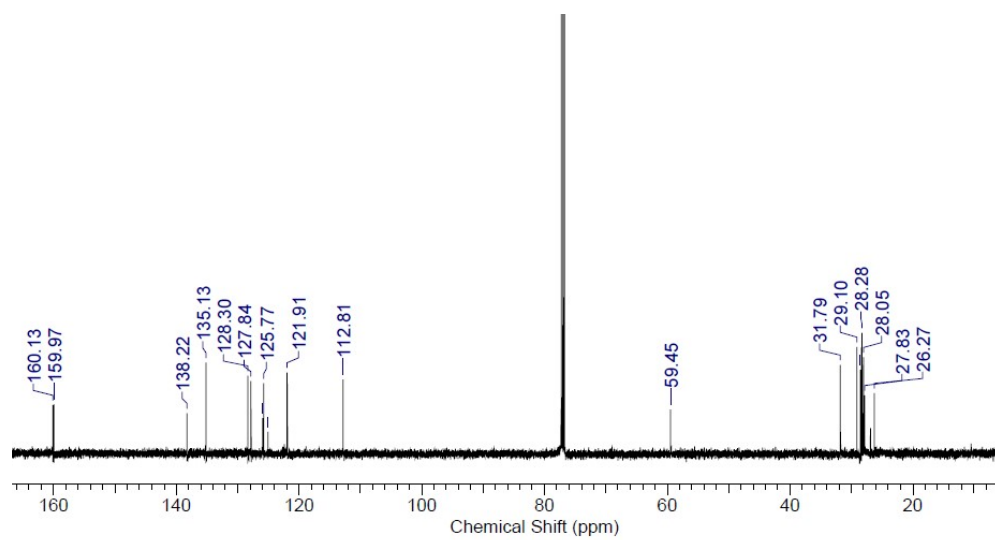

**Fig. S6.** (a)  $^1\text{H}$  and (b)  $^{13}\text{C}$  NMR spectra of (*R*)-**1f** in  $\text{CDCl}_3$ .



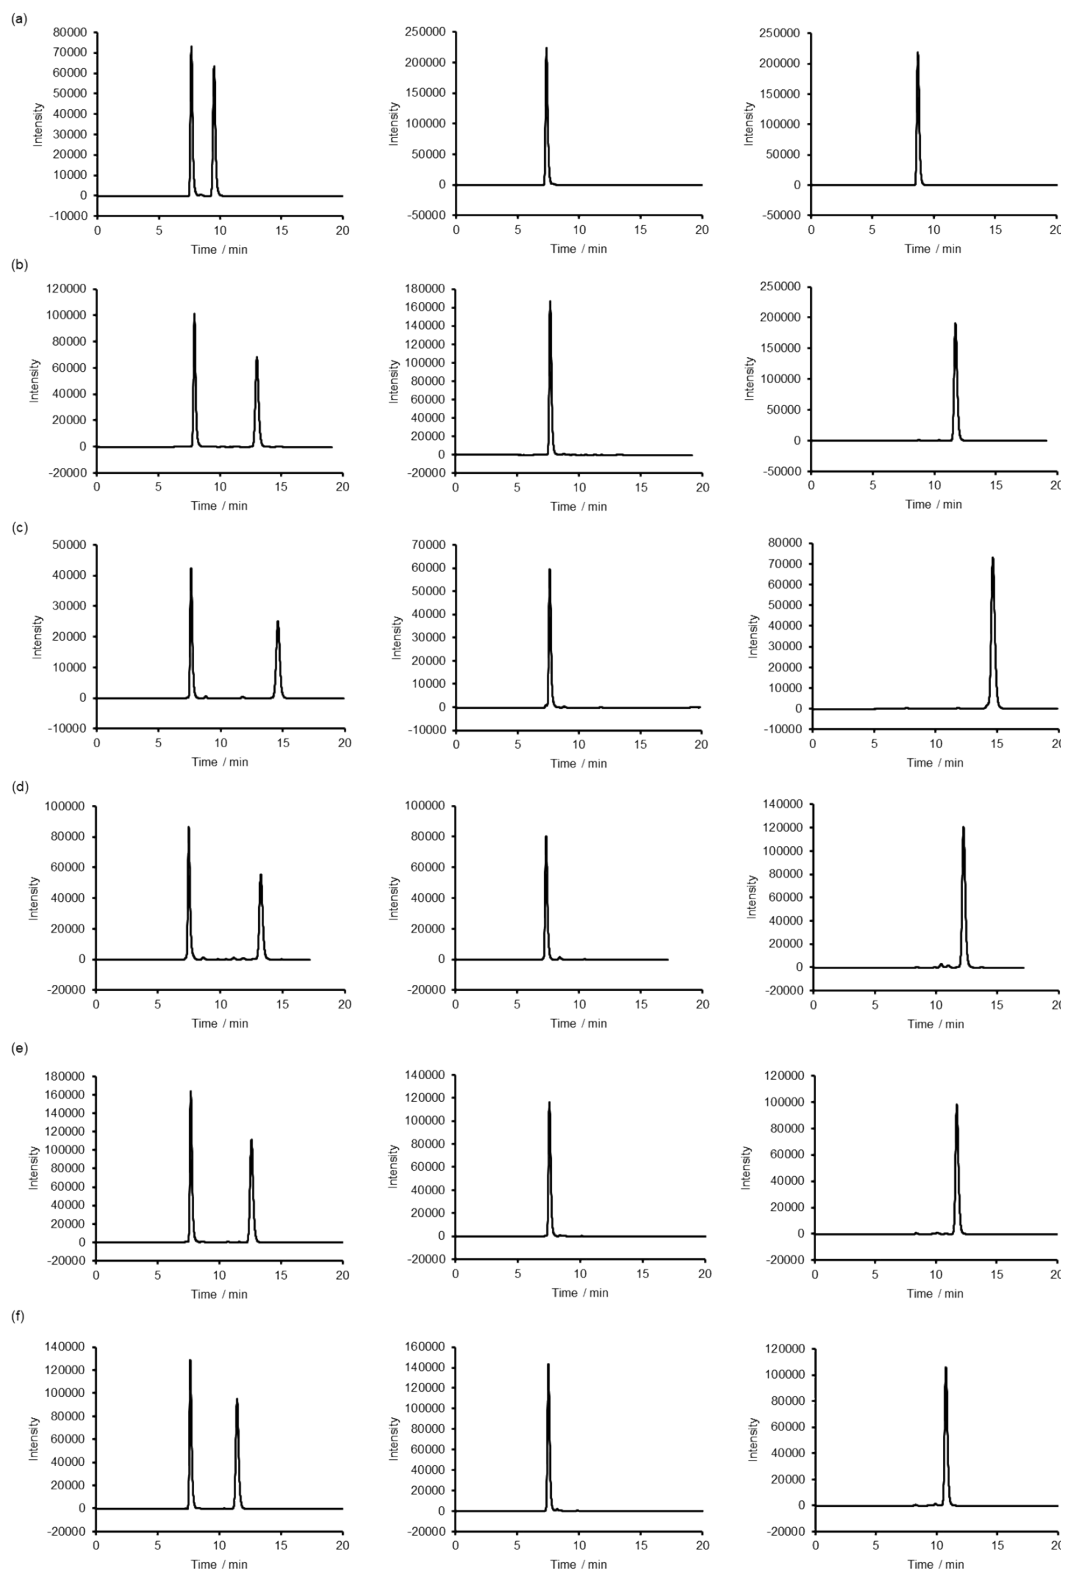

**Fig. S7.** Time-dependent UV absorption intensity of before (left) and after (middle and right) optical resolution of (a) **1a**, (b) **1b**, (c) **1c**, (d) **1d**, (e) **1e** and (f) **1f** on CHIRAL ART Cellulose-SC (CH<sub>2</sub>Cl<sub>2</sub>, flow = 0.5 mL/min, abs. at 250 nm).

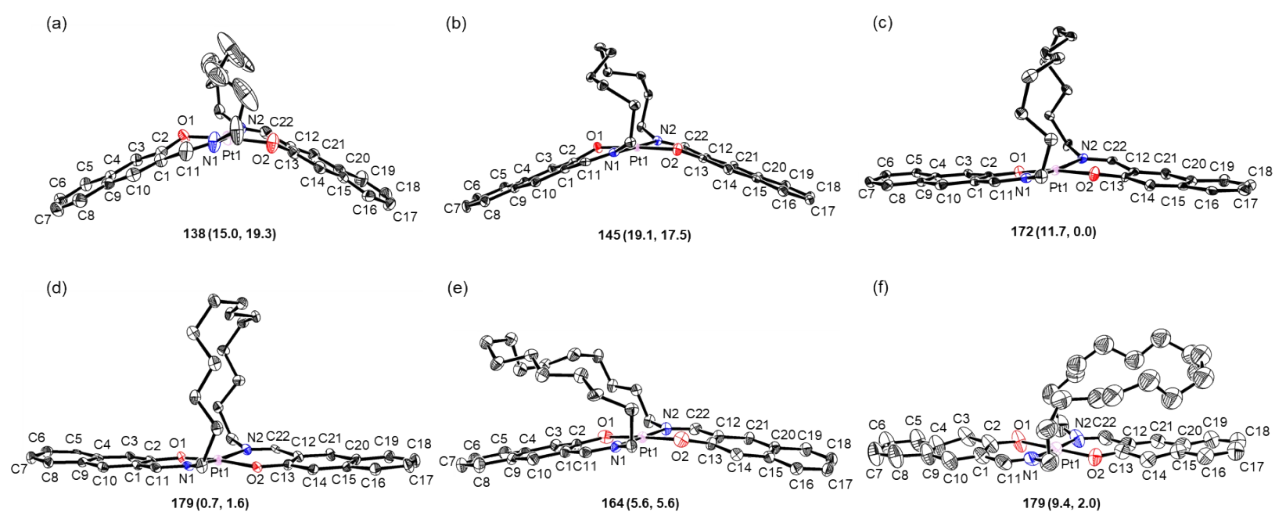

**Fig. S8.** ORTEP representation of (a) (*R*)-**1a**, (b) (*R*)-**1b**, (c) (*R*)-**1c**, (d) (*R*)-**1d**, (e) (*R*)-**1e** and (f) (*R*)-**1f** as their optically pure crystals. Thermal ellipsoids are shown at 50% probability level and hydrogen atoms are omitted for clarity. The angles of C(7)–Pt(1)–C(18) and dihedral angles of C(11)–N(1)–Pt(1)–O(1)/C(22)–N(2)–Pt(1)–O(2) (in parentheses) are given under the structure.

**Table S1.** Crystal data and structural refinement details for complexes (–)-**1a–e** and (+)-**1f**.<sup>[a]</sup>

|                                                                            | (–)- <b>1a</b>                                                   | (–)- <b>1b</b>                                                                                          | (–)- <b>1c</b>                                                   | (–)- <b>1d</b>                                                   | (–)- <b>1e</b>                                                   | (+)- <b>1f</b>                                                   |
|----------------------------------------------------------------------------|------------------------------------------------------------------|---------------------------------------------------------------------------------------------------------|------------------------------------------------------------------|------------------------------------------------------------------|------------------------------------------------------------------|------------------------------------------------------------------|
| Formula                                                                    | C <sub>30</sub> H <sub>30</sub> N <sub>2</sub> O <sub>2</sub> Pt | C <sub>32</sub> H <sub>34</sub> N <sub>2</sub> O <sub>2</sub> Pt<br>•1/3CH <sub>2</sub> Cl <sub>2</sub> | C <sub>34</sub> H <sub>38</sub> N <sub>2</sub> O <sub>2</sub> Pt | C <sub>36</sub> H <sub>42</sub> N <sub>2</sub> O <sub>2</sub> Pt | C <sub>36</sub> H <sub>42</sub> N <sub>2</sub> O <sub>2</sub> Pt | C <sub>40</sub> H <sub>50</sub> N <sub>2</sub> O <sub>2</sub> Pt |
| <i>M<sub>F</sub></i>                                                       | 645.67                                                           | 702.12                                                                                                  | 701.78                                                           | 729.83                                                           | 757.88                                                           | 785.94                                                           |
| <i>T</i> [K]                                                               | 113                                                              | 113                                                                                                     | 113                                                              | 113                                                              | 113                                                              | 113                                                              |
| Crystal color, habit                                                       | red, block                                                       | red, block                                                                                              | red, chip                                                        | red, chip                                                        | red, block                                                       | red, chip                                                        |
| Crystal size [mm]                                                          | 0.20×0.20×0.20                                                   | 0.20×0.20×0.10                                                                                          | 0.20×0.20×0.05                                                   | 0.20×0.20×0.20                                                   | 0.20×0.20×0.20                                                   | 0.10×0.10×0.05                                                   |
| Crystal system                                                             | orthorhombic                                                     | orthorhombic                                                                                            | orthorhombic                                                     | orthorhombic                                                     | orthorhombic                                                     | monoclinic                                                       |
| Space group                                                                | <i>P</i> 2 <sub>1</sub> 2 <sub>1</sub> 2 (#18)                   | <i>P</i> 2 <sub>1</sub> 2 <sub>1</sub> 2 <sub>1</sub> (#19)                                             | <i>P</i> 2 <sub>1</sub> 2 <sub>1</sub> 2 <sub>1</sub> (#19)      | <i>P</i> 2 <sub>1</sub> 2 <sub>1</sub> 2 <sub>1</sub> (#19)      | <i>P</i> 2 <sub>1</sub> 2 <sub>1</sub> 2 <sub>1</sub> (#19)      | <i>P</i> 2 <sub>1</sub> (#4)                                     |
| <i>a</i> [Å]                                                               | 17.04673(16)                                                     | 17.07120(16)                                                                                            | 12.075(3)                                                        | 22.1932(6)                                                       | 30.3209(7)                                                       | 9.1109(3)                                                        |
| <i>b</i> [Å]                                                               | 17.16019(18)                                                     | 17.85690(17)                                                                                            | 10.511(2)                                                        | 32.7977(7)                                                       | 9.4282(3)                                                        | 10.0604(4)                                                       |
| <i>c</i> [Å]                                                               | 13.07172(12)                                                     | 26.8416(2)                                                                                              | 22.225(5)                                                        | 32.8261(9)                                                       | 11.2103(3)                                                       | 18.7421(6)                                                       |
| <i>α</i> [°]                                                               | 90                                                               | 90                                                                                                      | 90                                                               | 90                                                               | 90                                                               | 90                                                               |
| <i>β</i> [°]                                                               | 90                                                               | 90                                                                                                      | 90                                                               | 90                                                               | 90                                                               | 91.389(3)                                                        |
| <i>γ</i> [°]                                                               | 90                                                               | 90                                                                                                      | 90                                                               | 90                                                               | 90                                                               | 90                                                               |
| <i>V</i> [Å <sup>3</sup> ]                                                 | 3823.81(6)                                                       | 8182.36(13)                                                                                             | 2820.8(11)                                                       | 23893.7(11)                                                      | 3204.71(15)                                                      | 1717.38(10)                                                      |
| <i>Z</i>                                                                   | 6                                                                | 12                                                                                                      | 4                                                                | 32                                                               | 4                                                                | 2                                                                |
| <i>D</i> <sub>calcd</sub> [gcm <sup>-3</sup> ]                             | 1.682                                                            | 1.710                                                                                                   | 1.652                                                            | 1.623                                                            | 1.571                                                            | 1.520                                                            |
| <i>μ</i> (MoK $\alpha$ ) [cm <sup>-1</sup> ]                               | 55.120                                                           | 52.226                                                                                                  | 49.884                                                           | 47.148                                                           | 43.973                                                           | 41.057                                                           |
| <i>F</i> (000)                                                             | 1908.00                                                          | 4176.48                                                                                                 | 1400.00                                                          | 11712.00                                                         | 1528.00                                                          | 796.00                                                           |
| 2 $\theta$ <sub>max</sub> [°]                                              | 55.0                                                             | 55.0                                                                                                    | 55.1                                                             | 55.0                                                             | 55.0                                                             | 55.0                                                             |
| No. of reflections                                                         | 69614                                                            | 148976                                                                                                  | 26918                                                            | 120429                                                           | 60703                                                            | 30832                                                            |
| No. observed reflections                                                   | 8767                                                             | 18755                                                                                                   | 6425                                                             | 52747                                                            | 7362                                                             | 7216                                                             |
| No. variables                                                              | 474                                                              | 1027                                                                                                    | 346                                                              | 2953                                                             | 388                                                              | 406                                                              |
| <i>R</i> <sub>1</sub> ( <i>I</i> > 2 $\sigma$ ( <i>I</i> )) <sup>[a]</sup> | 0.0220                                                           | 0.0152                                                                                                  | 0.0341                                                           | 0.0579                                                           | 0.0341                                                           | 0.1229                                                           |
| <i>wR</i> <sub>2</sub> (all reflections) <sup>[b]</sup>                    | 0.0572                                                           | 0.0358                                                                                                  | 0.0684                                                           | 0.1049                                                           | 0.0906                                                           | 0.3273                                                           |
| Goodness of fit                                                            | 1.082                                                            | 1.025                                                                                                   | 0.991                                                            | 0.969                                                            | 1.018                                                            | 1.068                                                            |
| Flack parameter                                                            | –0.004(3)                                                        | –0.0170(10)                                                                                             | –0.013(9)                                                        | –0.024(5)                                                        | –0.025(4)                                                        | 0.126(12)                                                        |

[a]  $R_1 = \Sigma(|F_o| - |F_c|) / \Sigma(|F_o|)$ . [b]  $wR_2 = [\Sigma(w(F_o^2 - F_c^2)^2) / \Sigma wF_o^2]^{1/2}$ .

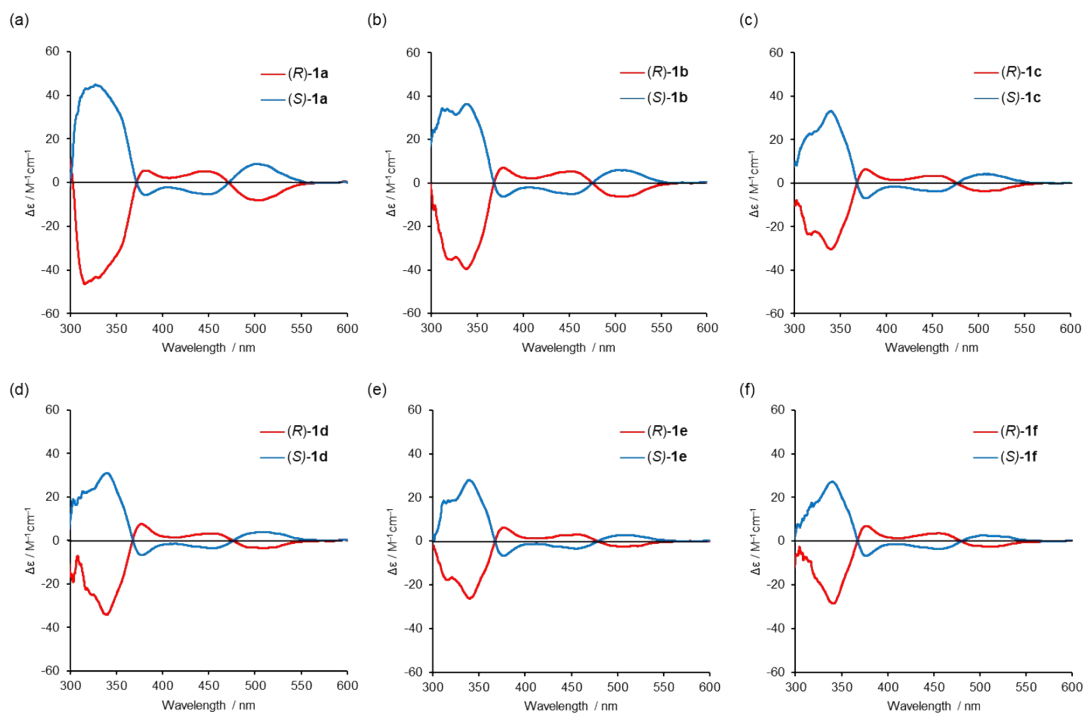

**Fig. S9.** CD spectra of  $2.00 \times 10^{-4}$  M solutions of (a) **1a**, (b) **1b**, (c) **1c**, (d) **1d**, (e) **1e**, and (f) **1f** in 2-MeTHF.

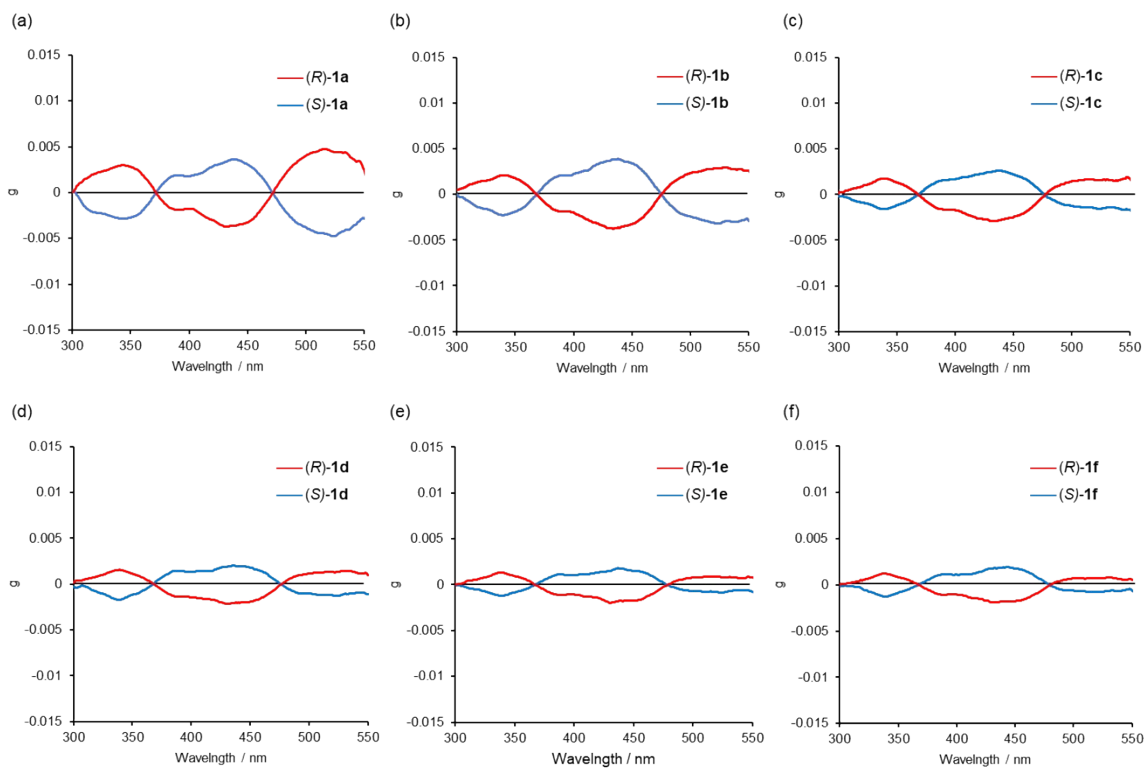

**Fig. S10.** Anisotropy factor  $g$  values of CD spectra for (a) **1a**, (b) **1b**, (c) **1c**, (d) **1d**, (e) **1e**, (f) **1f** in 2-MeTHF.

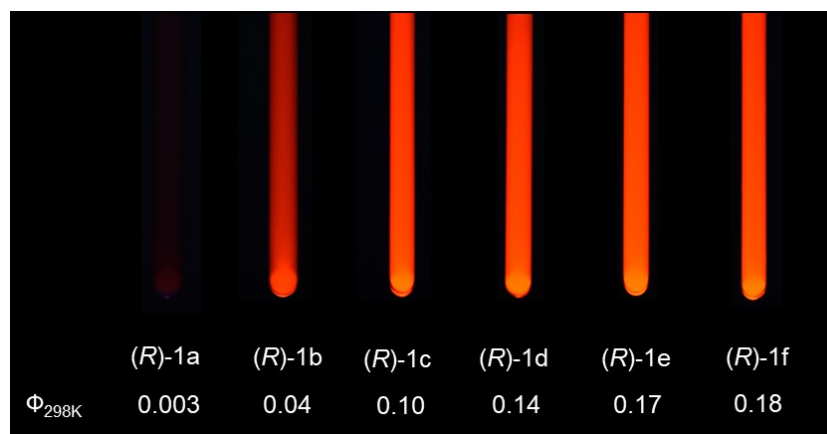

**Fig. S11.** Photographs of  $2.00 \times 10^{-4}$  M solutions of (R)-1a-f in 2-MeTHF under UV irradiation (365 nm) at room temperature.

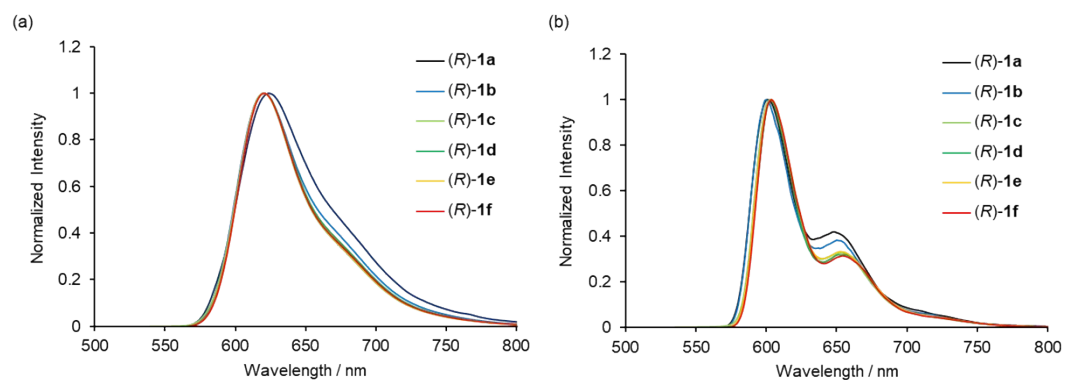

**Fig. S12.** Normalized emission spectra for (R)-1a–f in 2-MeTHF solution state ( $2.0 \times 10^{-4}$  M) at a) 298 K and b) 77 K ( $\lambda_{\text{ex}} = 500$  nm).

**Table S2.** Photophysical data for (*R*)-**1a–f**.<sup>[a]</sup>

| Compound  | $\lambda_{\text{abs}}$ [nm] | $\lambda_{\text{em}}$ [nm] <sup>[b]</sup> | $\Phi$ <sup>[b,c,d]</sup> | $\tau$ [ $\mu\text{s}$ ] <sup>[b,e]</sup> | $k_r \times 10^4$ [ $\text{s}^{-1}$ ] <sup>[b,d]</sup> | $k_{\text{nr}} \times 10^5$ [ $\text{s}^{-1}$ ] <sup>[b,e]</sup> | CIE (x, y) <sup>[f]</sup> |
|-----------|-----------------------------|-------------------------------------------|---------------------------|-------------------------------------------|--------------------------------------------------------|------------------------------------------------------------------|---------------------------|
| <b>1a</b> | 487                         | 624 (601, 648)                            | 0.003 (0.36)              | 0.16 (27.2)                               | 1.8 (1.3)                                              | 62 (0.24)                                                        | 0.67, 0.33                |
| <b>1b</b> | 493                         | 620 (600, 650)                            | 0.05 (0.41)               | 2.7 (24.5)                                | 1.9 (1.7)                                              | 3.5 (0.24)                                                       | 0.67, 0.33                |
| <b>1c</b> | 497                         | 620 (603, 657)                            | 0.10 (0.45)               | 5.1 (22.1)                                | 2.0 (2.0)                                              | 1.8 (0.25)                                                       | 0.67, 0.33                |
| <b>1d</b> | 498                         | 620 (603, 651)                            | 0.14 (0.43)               | 5.3 (21.4)                                | 2.6 (2.0)                                              | 1.6 (0.27)                                                       | 0.67, 0.33                |
| <b>1e</b> | 498                         | 620 (603, 652)                            | 0.17 (0.41)               | 5.7 (21.8)                                | 3.0 (1.9)                                              | 1.5 (0.27)                                                       | 0.67, 0.33                |
| <b>1f</b> | 499                         | 621 (604, 654)                            | 0.18 (0.42)               | 5.8 (20.1)                                | 3.1 (2.1)                                              | 1.4 (0.29)                                                       | 0.67, 0.33                |

[a] Data were obtained from a  $2.0 \times 10^{-4}$  M in 2-MeTHF at 298 K unless otherwise stated. [b] Values in parentheses are those measured at 77 K. [c]  $\lambda_{\text{ex}} = 500$  nm. [d] Luminescent quantum efficiencies measured using the absolute method with an integrating sphere. [e]  $k_r = \Phi_{298\text{K}}/\tau$ . [f]  $k_{\text{nr}} = (1 - \Phi_{298\text{K}})/\tau$ . [g] CIE color coordinates for the emission at 298 K.



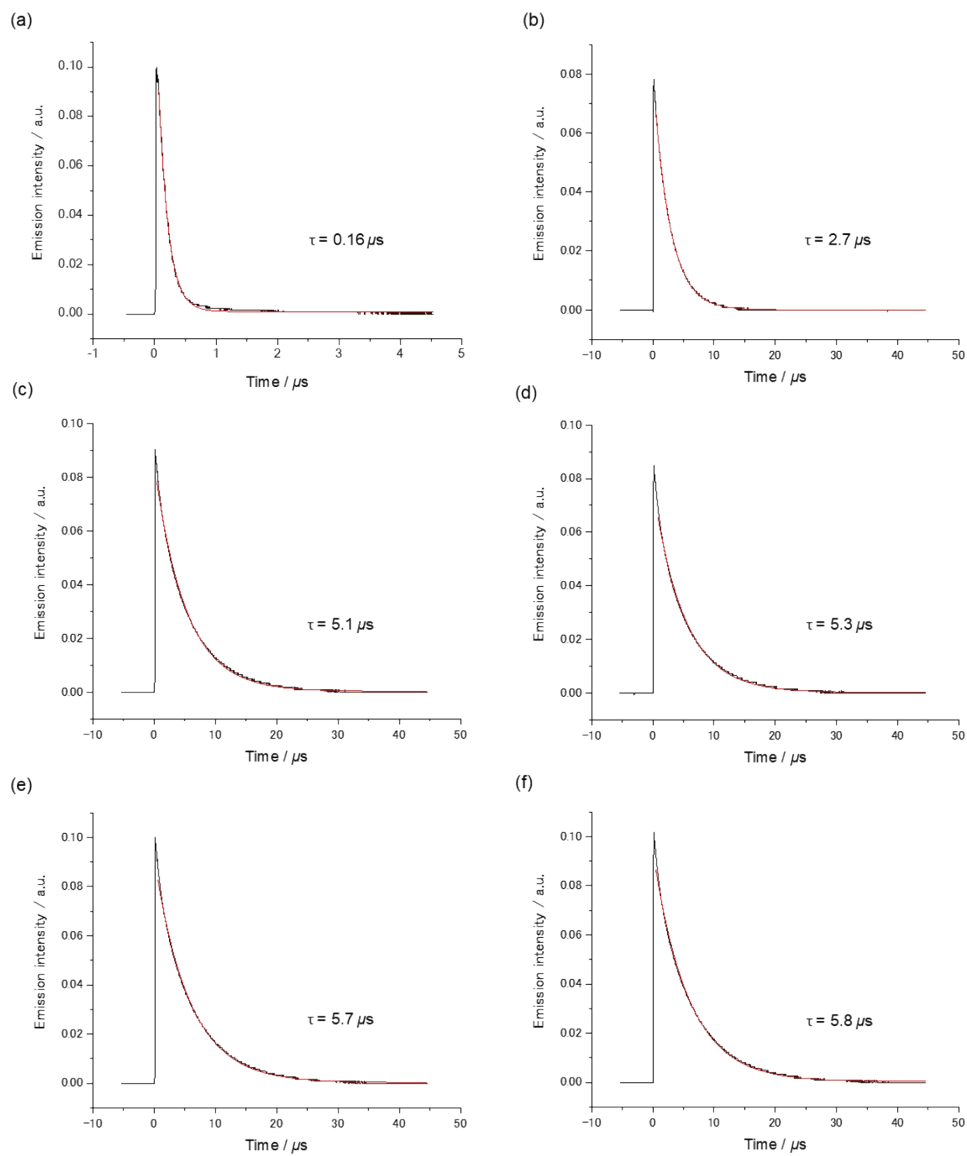

**Fig. S13.** Emission decay curves (black line) for (a) (R)-1a, (b) (R)-1b, (c) (R)-1c (d) (R)-1d, (e) (R)-1e, and (f) (R)-1f in 2-MeTHF solution state ( $2.0 \times 10^{-4}$  M) at 298 K [ $\lambda_{\text{ex}} = 355$  nm,  $\lambda_{\text{em}} = 620$  nm]. The red curves are those estimated by single-exponential fitting analysis.

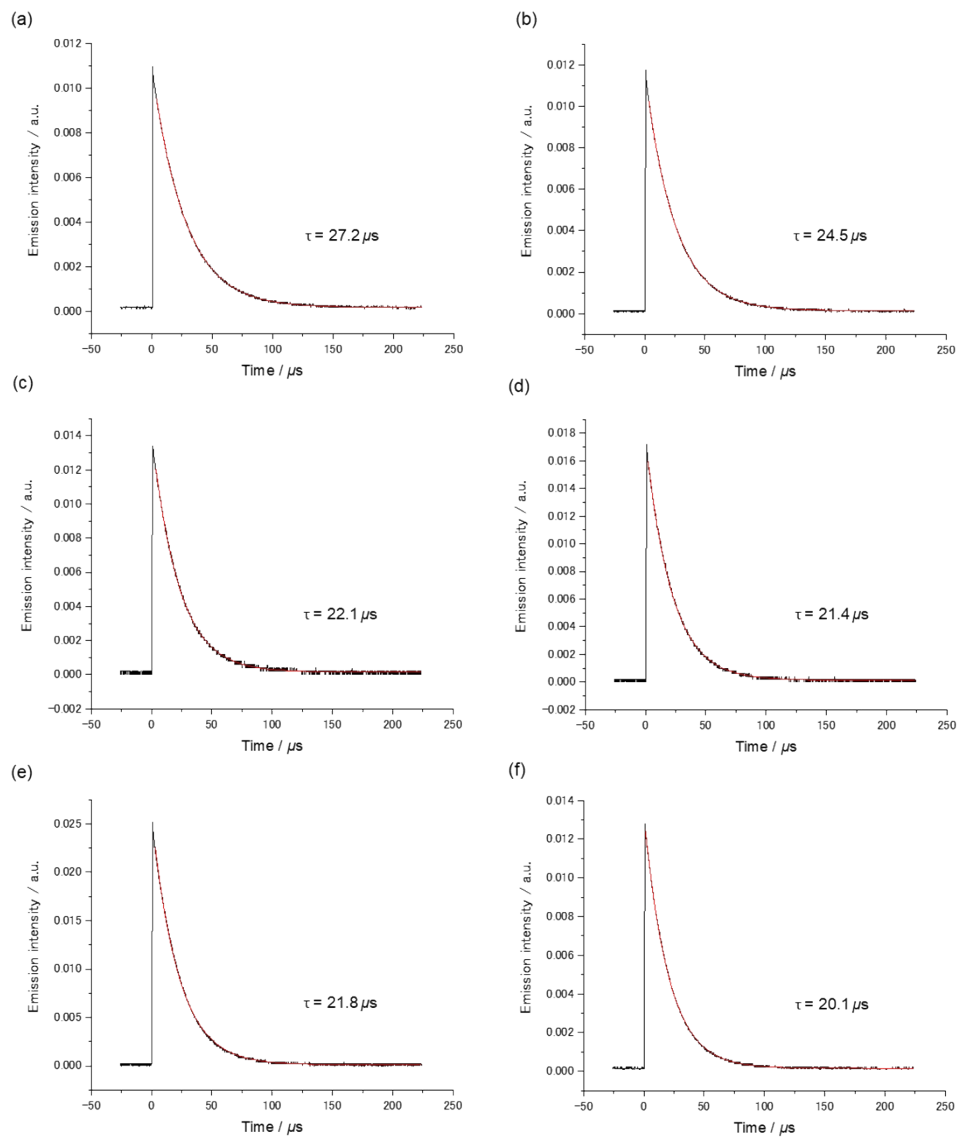

**Fig. S14.** Emission decay curves (black line) for (a) (R)-1a, (b) (R)-1b, (c) (R)-1c (d) (R)-1d, (e) (R)-1e, and (f) (R)-1f in 2-MeTHF solution state ( $2.0 \times 10^{-4}$  M) at 77 K [ $\lambda_{\text{ex}} = 355$  nm,  $\lambda_{\text{em}} = 620$  nm]. The red curves are those estimated by single-exponential fitting analysis.

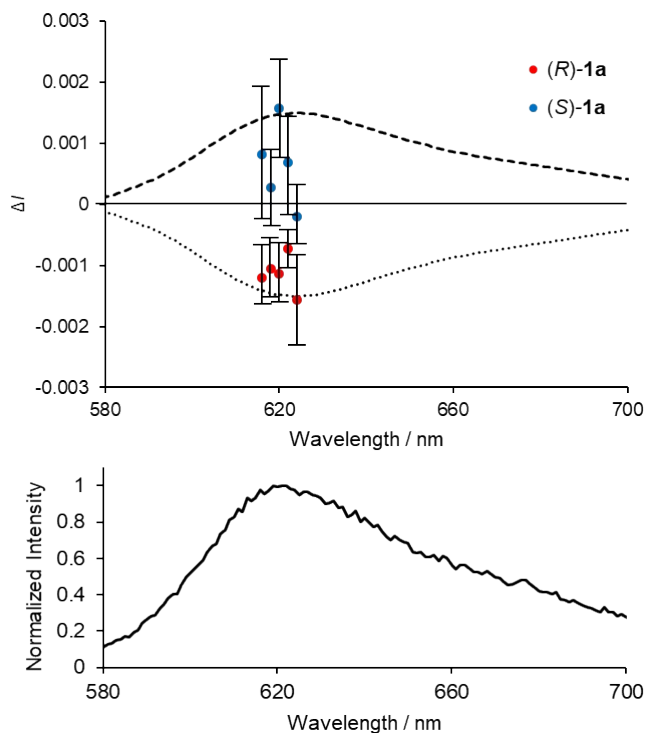

**Fig. S15.** CPL (upper figure) and total emission (lower figure) spectra of  $2.0 \times 10^{-4}$  M solutions of **1a** in 2-MeTHF at 298 K ( $\lambda_{\text{ex}} = 420$  nm). Red and blue circles in the CPL spectra correspond to optically pure (100% *ee*) (*R*)- and (*S*)-compounds, respectively, and each point is plotted with a standard error bar. The dashed lines in the upper figure are presented to show the luminescence spectral line shape. The average  $g_{\text{lum}}$  value was calculated to be  $-3.4 \times 10^{-3}$  for (*R*)-**1a** and  $+2.7 \times 10^{-3}$  for (*S*)-**1a**, respectively. Although the number of measured data is limited due to the weak luminescence intensity, the (*R*)-form tends to show (–)-CPL and the (*S*)-form (+)-CPL, as in **1b–f**.

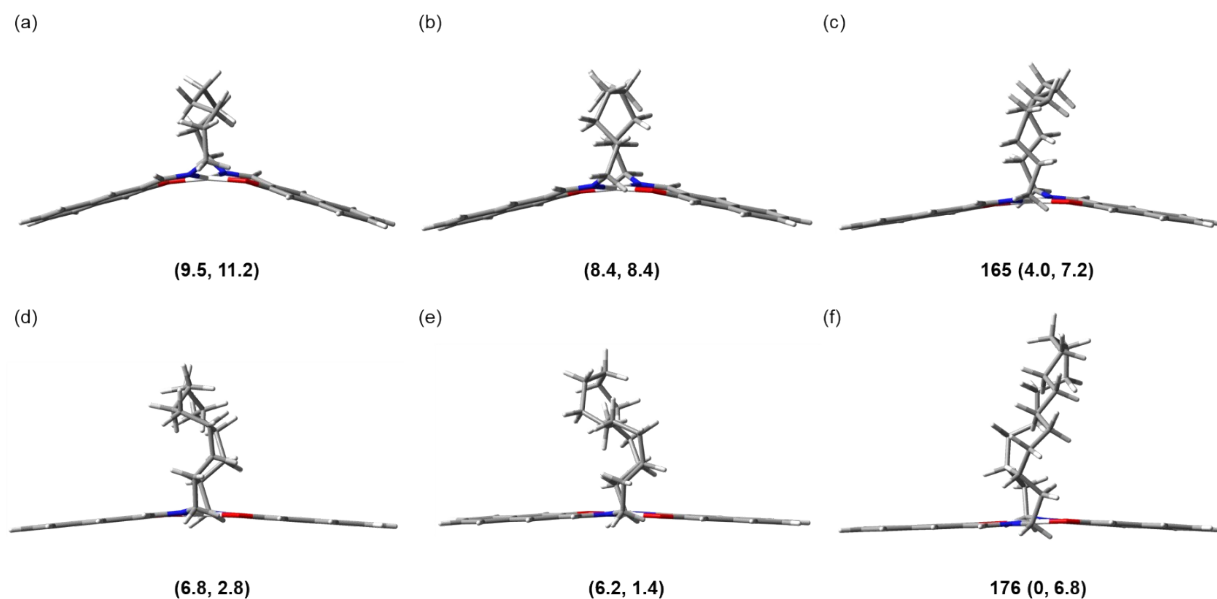

**Fig. S16.** Optimized molecular structures of (a) (*R*)-**1a**, (b) (*R*)-**1b**, (c) (*R*)-**1c**, (d) (*R*)-**1d**, (e) (*R*)-**1e** and (f) (*R*)-**1f** in the excited state ( $T_1$ ) as obtained from DFT calculations (UB3LYP/6-31G\*, LanL2DZ). The C(11)–N(1)–Pt(1)–O(1) and C(22)–N(2)–Pt(1)–O(2) dihedral angles are provided in parentheses under each structure.

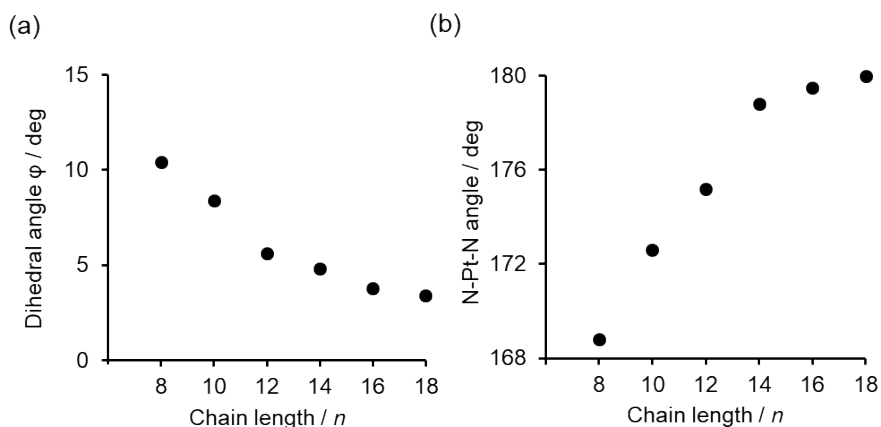

**Fig. S17.** Relationship between linker length and distortion of coordination site for (*R*)-**1a–f**. (a) The average C(11)–N(1)–Pt(1)–O(1)/C(22)–N(2)–Pt(1)–O(2) dihedral angles and (b) N(1)–Pt(1)–N(2) angles as functions of chain length. Values were estimated based on optimized structures in the excited state ( $T_1$ ) estimated using DFT calculations (UB3LYP/6-31G\*, LanL2DZ).

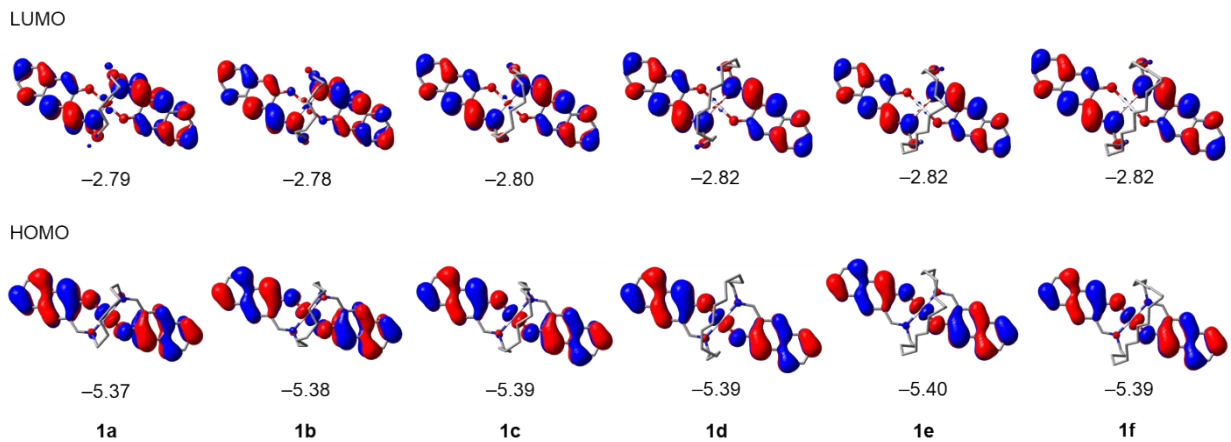

**Fig. S18.** Frontier orbitals and their eigenvalues [eV] for **1a–f** as estimated from DFT calculations (UB3LYP/6-31G\*, LanL2DZ) on the basis of the optimized geometries in the T<sub>1</sub> state.

**Table S3.** Selected data for excitation energy, major configuration, coefficient, oscillator strength, and the character of charge transfer for (*R*)-**1a–f** (for the geometries optimized in the S<sub>0</sub> state).<sup>[a]</sup>

| Compound               | State          | Excitation energy (eV) | Major configuration <sup>[b]</sup> | Coefficient | Oscillator strength | Character                          |
|------------------------|----------------|------------------------|------------------------------------|-------------|---------------------|------------------------------------|
| <i>(R)</i> - <b>1a</b> | S <sub>1</sub> | 2.38 (521 nm)          | H→L                                | 0.693       | 0.0212              | <sup>1</sup> MLCT/ <sup>1</sup> LC |
|                        | T <sub>1</sub> | 1.95 (636 nm)          | H→L                                | 0.550       | —                   | <sup>3</sup> MLCT/ <sup>3</sup> LC |
| <i>(R)</i> - <b>1b</b> | S <sub>1</sub> | 2.37 (522 nm)          | H→L                                | 0.696       | 0.0229              | <sup>1</sup> MLCT/ <sup>1</sup> LC |
|                        | T <sub>1</sub> | 1.95 (637 nm)          | H→L                                | 0.601       | —                   | <sup>3</sup> MLCT/ <sup>3</sup> LC |
| <i>(R)</i> - <b>1c</b> | S <sub>1</sub> | 2.37 (522 nm)          | H→L                                | 0.697       | 0.0244              | <sup>1</sup> MLCT/ <sup>1</sup> LC |
|                        | T <sub>1</sub> | 1.93 (642 nm)          | H→L                                | 0.603       | —                   | <sup>3</sup> MLCT/ <sup>3</sup> LC |
| <i>(R)</i> - <b>1d</b> | S <sub>1</sub> | 2.34 (530 nm)          | H→L                                | 0.698       | 0.0259              | <sup>1</sup> MLCT/ <sup>1</sup> LC |
|                        | T <sub>1</sub> | 1.91 (650 nm)          | H→L                                | 0.609       | —                   | <sup>3</sup> MLCT/ <sup>3</sup> LC |
| <i>(R)</i> - <b>1e</b> | S <sub>1</sub> | 2.33 (531 nm)          | H→L                                | 0.698       | 0.0263              | <sup>1</sup> MLCT/ <sup>1</sup> LC |
|                        | T <sub>1</sub> | 1.90 (652 nm)          | H→L                                | 0.611       | —                   | <sup>3</sup> MLCT/ <sup>3</sup> LC |
| <i>(R)</i> - <b>1f</b> | S <sub>1</sub> | 2.33 (532 nm)          | H→L                                | 0.698       | 0.0270              | <sup>1</sup> MLCT/ <sup>1</sup> LC |
|                        | T <sub>1</sub> | 1.90 (652 nm)          | H→L                                | 0.613       | —                   | <sup>3</sup> MLCT/ <sup>3</sup> LC |

[a] Estimated by TD-DFT (B3LYP/6-31G\*, LanL2DZ) calculations based on the optimized geometries. [b] Molecular orbitals are shown in Fig. 7.

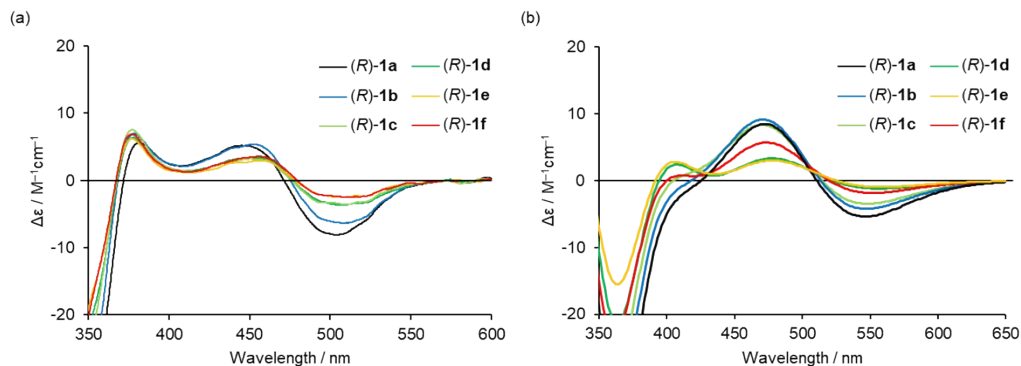

**Fig. S19.** (a) Experimental ( $2.0 \times 10^{-4}$  M in 2-MeTHF) and (b) theoretical CD spectra of (*R*)-**1a-f**. Theoretical spectra were estimated by DFT (B3LYP/6-31G\*, LanL2DZ) calculation.

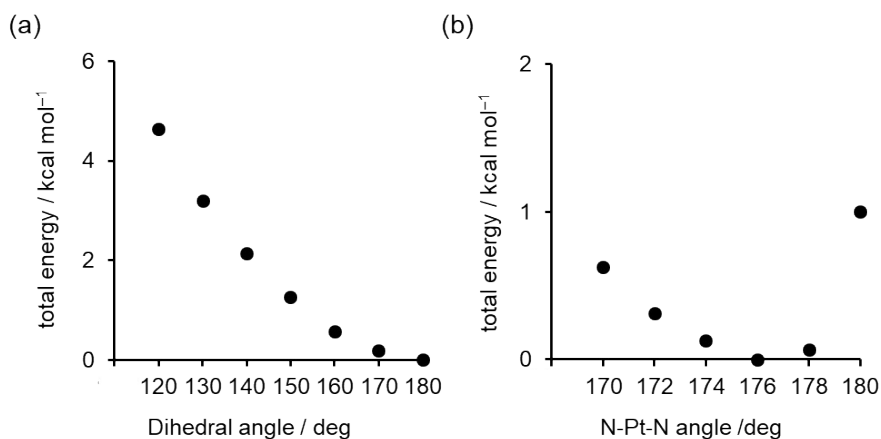

**Fig. S20** Effects of (a) the C(23)–N(1)–N(2)–C(24) dihedral angles and (b) N(1)–Pt(1)–N(2) angles on total energies of **2** estimated using DFT calculations (B3LYP/6-31G\*, LanL2DZ).

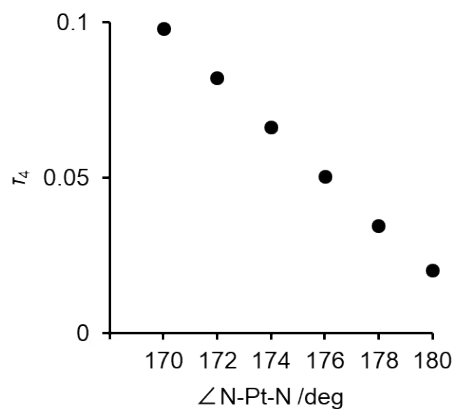

**Fig. S21** Effects of N(1)–Pt(1)–N(2) angles on geometry index ( $\tau_4$ ) of **2** estimated using DFT calculations (B3LYP/6-31G\*, LanL2DZ).

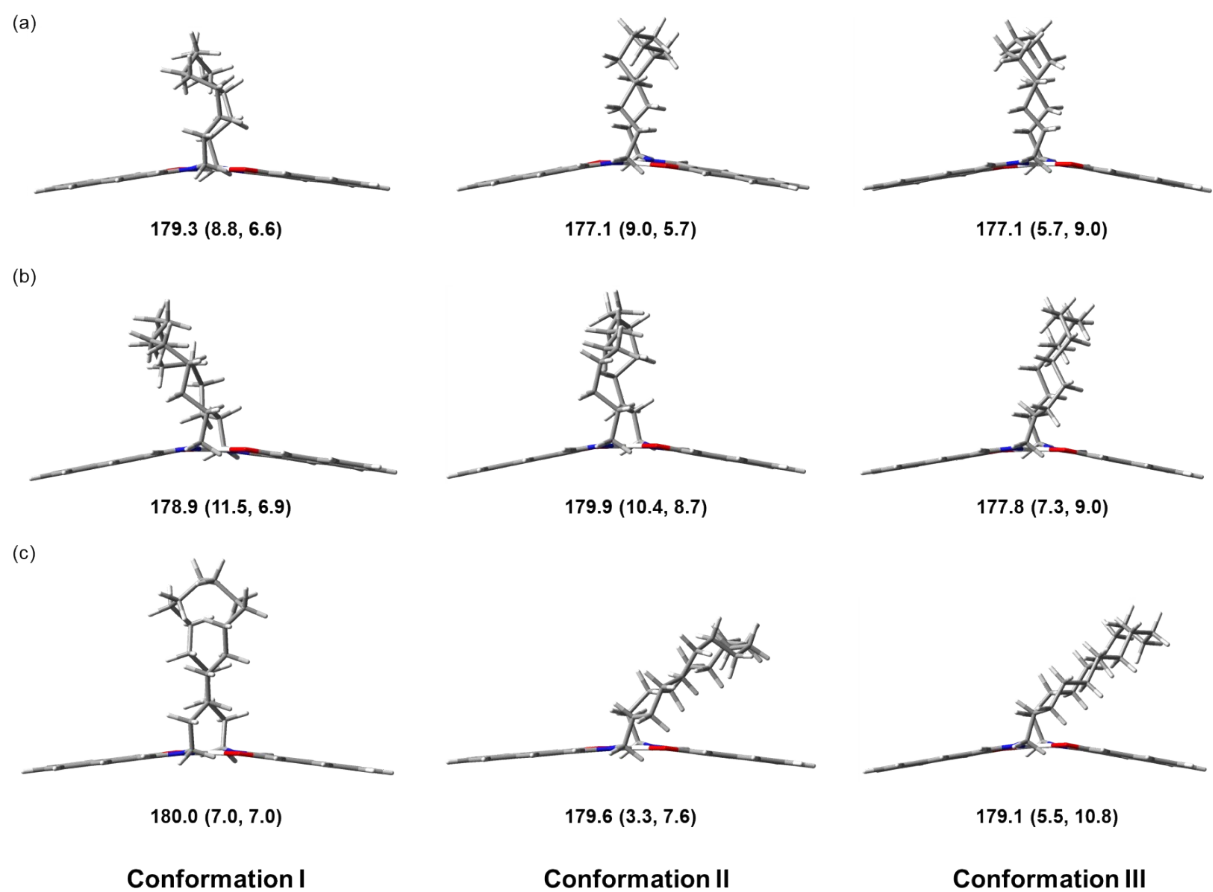

**Fig. S22.** Optimized structures of (a) (*R*)-**1d**, (b) (*R*)-**1e**, and (c) (*R*)-**1f** in the  $S_0$  state estimated by DFT calculations from different initial structures (B3LYP/6-31G\*, LanL2DZ). The N(1)–Pt(1)–N(2) angles and the C(11)–N(1)–Pt(1)–O(1)/C(22)–N(2)–Pt(1)–O(2) dihedral angles (in parentheses) and are provided under each structure.

**Table S4.** Relative energies of various conformations of (*R*)-**1d–f** and transition dipole moments in the  $S_0 \rightarrow S_1$  transition.<sup>[a]</sup>

| Compound               | Structure        | Relative energy<br>(kcal/mol) | $ \mu_e  / 10^{-20}$ [b]<br>(esu . cm) | $ \mu_m  / 10^{-20}$ [c]<br>(erg . G <sup>-1</sup> ) | $\cos(\theta_{e,m})$ [d] | $g_{\text{abs}}$ [e]  |
|------------------------|------------------|-------------------------------|----------------------------------------|------------------------------------------------------|--------------------------|-----------------------|
| <i>(R)</i> - <b>1d</b> | Optimized        | 0                             | 170.8                                  | 0.367                                                | -0.110                   | $-9.5 \times 10^{-4}$ |
|                        | Conformation I   | 0.02                          | 170.9                                  | 0.367                                                | -0.106                   | $-9.1 \times 10^{-4}$ |
|                        | Conformation II  | 1.63                          | 168.0                                  | 0.386                                                | -0.306                   | $-2.8 \times 10^{-3}$ |
|                        | Conformation III | 1.63                          | 168.0                                  | 0.385                                                | -0.306                   | $-2.8 \times 10^{-3}$ |
| <i>(R)</i> - <b>1e</b> | Optimized        | 0                             | 172.3                                  | 0.357                                                | -0.0890                  | $-7.4 \times 10^{-4}$ |
|                        | Conformation I   | 6.66                          | 171.2                                  | 0.398                                                | -0.0239                  | $-2.2 \times 10^{-4}$ |
|                        | Conformation II  | 5.33                          | 170.2                                  | 0.422                                                | -0.0875                  | $-8.7 \times 10^{-4}$ |
|                        | Conformation III | 6.40                          | 170.8                                  | 0.422                                                | -0.216                   | $-2.1 \times 10^{-3}$ |
| <i>(R)</i> - <b>1f</b> | Optimized        | 0                             | 174.7                                  | 0.377                                                | -0.0600                  | $-5.2 \times 10^{-4}$ |
|                        | Conformation I   | 1.26                          | 175.6                                  | 0.427                                                | -0.142                   | $-1.4 \times 10^{-3}$ |
|                        | Conformation II  | 3.70                          | 174.4                                  | 0.328                                                | -0.102                   | $-7.7 \times 10^{-4}$ |
|                        | Conformation III | 3.26                          | 170.4                                  | 0.406                                                | -0.149                   | $-1.5 \times 10^{-3}$ |

[a] Estimated by TD-DFT (B3LYP/6-31G\*, LanL2DZ) calculations. [b] Transition electric dipole moment (TEDM). [c] Transition magnetic dipole moment (TMDM). [d]  $\cos(\theta_{e,m})$  represents the angle of TEDM and TMDM. [e] Dissymmetry factor ( $g_{\text{abs}}$ ) was calculated follows:  $g_{\text{abs}} = 4R/(D + G)$ , where  $R$ ,  $D$ , and  $G$  represent the rotatory, electric dipole, magnetic dipole strength ( $R = |\mu_e||\mu_m|\cos\theta$ ,  $D = |\mu_e|^2$ ,  $G = |\mu_m|^2$ )



**Table S5.** Cartesian coordinates (in angstrom) of (*R*)-**1a** in the S<sub>0</sub> state<sup>[a]</sup>.

| atom | x        | y        | z        |
|------|----------|----------|----------|
| Pt   | 0.02439  | 0.14294  | -0.02232 |
| O    | 1.84087  | 0.22508  | 0.90696  |
| O    | -1.75518 | -0.08291 | -0.98361 |
| N    | 0.95782  | 0.29181  | -1.8362  |
| N    | -0.91171 | 0.32869  | 1.77648  |
| C    | 3.14075  | -0.48605 | -1.03071 |
| C    | 2.91875  | -0.3369  | 0.39268  |
| C    | 3.93822  | -0.74985 | 1.25353  |
| H    | 3.77512  | -0.63166 | 2.32102  |
| C    | 5.14739  | -1.30235 | 0.78796  |
| C    | 6.18096  | -1.73369 | 1.67123  |
| H    | 6.02689  | -1.63183 | 2.74266  |
| C    | 7.34959  | -2.26834 | 1.18328  |
| H    | 8.12523  | -2.59109 | 1.87312  |
| C    | 7.56109  | -2.40577 | -0.21608 |
| H    | 8.49194  | -2.83032 | -0.58112 |
| C    | 6.58808  | -2.00157 | -1.09753 |
| H    | 6.73706  | -2.10175 | -2.17053 |
| C    | 5.36429  | -1.44476 | -0.62739 |
| C    | 4.34679  | -1.01075 | -1.49464 |
| H    | 4.5059   | -1.09059 | -2.5689  |
| C    | 2.20467  | -0.00039 | -2.01821 |
| H    | 2.6122   | 0.1608   | -3.02009 |
| C    | -3.09374 | -0.51404 | 1.01464  |
| C    | -2.86021 | -0.5151  | -0.41521 |
| C    | -3.89642 | -0.96575 | -1.24081 |
| H    | -3.72037 | -0.96111 | -2.31275 |
| C    | -5.12907 | -1.41657 | -0.73604 |
| C    | -6.17955 | -1.88209 | -1.583   |
| H    | -6.01772 | -1.88813 | -2.65809 |
| C    | -7.3723  | -2.31416 | -1.05553 |
| H    | -8.16033 | -2.66419 | -1.7175  |
| C    | -7.59429 | -2.3102  | 0.35004  |
| H    | -8.54495 | -2.65601 | 0.74583  |
| C    | -6.60711 | -1.87025 | 1.19675  |
| H    | -6.7638  | -1.86254 | 2.27329  |
| C    | -5.35672 | -1.41535 | 0.68561  |
| C    | -4.32413 | -0.95029 | 1.51439  |

|   |          |         |          |
|---|----------|---------|----------|
| H | -4.48868 | -0.9274 | 2.5905   |
| C | -2.15019 | 0.00329 | 1.97383  |
| H | -2.54354 | 0.15828 | 2.98277  |
| C | 0.22213  | 0.97697 | -2.91577 |
| H | -0.60489 | 0.3291  | -3.21871 |
| H | 0.9007   | 1.1072  | -3.76886 |
| C | -0.35886 | 2.33147 | -2.45306 |
| H | -1.21436 | 2.10909 | -1.81142 |
| H | -0.76475 | 2.82783 | -3.34528 |
| C | 0.6195   | 3.27753 | -1.72589 |
| H | 1.34317  | 2.69509 | -1.14508 |
| H | 1.20664  | 3.83945 | -2.46548 |
| C | -0.08801 | 4.2754  | -0.78231 |
| H | -0.88062 | 4.79077 | -1.34356 |
| H | 0.62918  | 5.05564 | -0.48976 |
| C | -0.70384 | 3.66306 | 0.49525  |
| H | -1.40517 | 4.39262 | 0.92583  |
| H | -1.308   | 2.78733 | 0.2311   |
| C | 0.31597  | 3.28077 | 1.58642  |
| H | 0.79901  | 4.20447 | 1.93422  |
| H | 1.11494  | 2.65772 | 1.17091  |
| C | -0.30263 | 2.55959 | 2.81224  |
| H | 0.19774  | 2.90959 | 3.72505  |
| H | -1.35938 | 2.84375 | 2.92016  |
| C | -0.19084 | 1.01845 | 2.8637   |
| H | 0.85436  | 0.716   | 2.79441  |
| H | -0.5959  | 0.66819 | 3.82257  |

---

[a] The geometry was optimized by DFT calculation (B3LYP/6-31G\*, LanL2DZ ).

**Table S6.** Cartesian coordinates (in angstrom) of (*R*)-**1b** in the S<sub>0</sub> state<sup>[a]</sup>.

| atom | x        | y        | z        |
|------|----------|----------|----------|
| Pt   | 0.00003  | -0.20376 | 0        |
| O    | 1.79761  | -0.26887 | 0.94864  |
| O    | -1.79752 | -0.26922 | -0.94868 |
| N    | 0.90924  | -0.1003  | -1.82865 |
| N    | -0.9092  | -0.09996 | 1.82863  |
| C    | 2.92612  | -0.66388 | 0.4005   |
| C    | -2.16643 | -0.35573 | 2.0091   |
| H    | -2.54529 | -0.25689 | 3.02964  |
| C    | -0.13081 | 0.41014  | 2.9738   |
| H    | -0.76347 | 0.36417  | 3.87003  |
| H    | 0.72538  | -0.25373 | 3.11044  |
| C    | 3.1501   | -0.73884 | -1.0269  |
| C    | 4.40336  | -1.12385 | -1.511   |
| H    | 4.55994  | -1.15884 | -2.58795 |
| C    | 0.6902   | 2.89213  | -2.43044 |
| H    | 1.36014  | 2.51647  | -1.6474  |
| H    | 1.31767  | 3.04884  | -3.31987 |
| C    | 0.38538  | 1.84225  | 2.74438  |
| H    | 0.92891  | 2.13446  | 3.65437  |
| H    | 1.12655  | 1.799    | 1.94284  |
| C    | 0.13081  | 0.40957  | -2.97389 |
| H    | 0.76343  | 0.36348  | -3.87013 |
| H    | -0.72537 | -0.25435 | -3.1104  |
| C    | -2.92606 | -0.66408 | -0.40044 |
| C    | 2.16649  | -0.35601 | -2.00909 |
| H    | 2.54534  | -0.25729 | -3.02964 |
| C    | 5.46886  | -1.46825 | -0.66473 |
| C    | -0.51695 | 4.26181  | -0.56999 |
| H    | -1.14065 | 5.16172  | -0.47029 |
| H    | -1.19953 | 3.40984  | -0.45709 |
| C    | 6.74267  | -1.87423 | -1.15861 |
| H    | 6.89235  | -1.92469 | -2.23498 |
| C    | 0.5165   | 4.26222  | 0.5694   |
| H    | 1.13967  | 5.16247  | 0.46948  |
| H    | 1.19956  | 3.41061  | 0.45663  |
| C    | -6.7426  | -1.8741  | 1.15892  |
| H    | -6.89227 | -1.92435 | 2.2353   |
| C    | -3.99333 | -0.99284 | -1.24348 |
| H    | -3.82404 | -0.93104 | -2.31473 |

|   |          |          |          |
|---|----------|----------|----------|
| C | -0.38545 | 1.84171  | -2.74471 |
| H | -0.92882 | 2.1338   | -3.65483 |
| H | -1.12675 | 1.79851  | -1.94328 |
| C | -4.40328 | -1.12364 | 1.51115  |
| H | -4.55988 | -1.1584  | 2.58811  |
| C | 5.25004  | -1.39402 | 0.75624  |
| C | 3.99338  | -0.99253 | 1.2436   |
| H | 3.82409  | -0.93054 | 2.31485  |
| C | -6.33301 | -1.73707 | -1.62013 |
| H | -6.17823 | -1.68556 | -2.69505 |
| C | -5.4688  | -1.4682  | 0.66496  |
| C | 0.09921  | 4.24597  | -1.9851  |
| H | -0.66675 | 4.55178  | -2.71214 |
| H | 0.88527  | 5.01279  | -2.03461 |
| C | -0.09949 | 4.24641  | 1.98457  |
| H | -0.88557 | 5.01322  | 2.03412  |
| H | 0.66659  | 4.55234  | 2.71145  |
| C | 7.76098  | -2.19606 | -0.29566 |
| H | 8.72948  | -2.50521 | -0.67826 |
| C | -7.54791 | -2.12511 | -1.10902 |
| H | -8.36046 | -2.38202 | -1.78389 |
| C | 6.33307  | -1.73669 | 1.62041  |
| H | 6.17826  | -1.68501 | 2.69532  |
| C | -5.24999 | -1.39423 | -0.75603 |
| C | -7.76091 | -2.19612 | 0.29603  |
| H | -8.72938 | -2.50524 | 0.67871  |
| C | -0.69036 | 2.89261  | 2.43018  |
| H | -1.31764 | 3.04944  | 3.31972  |
| H | -1.36046 | 2.51682  | 1.64735  |
| C | 7.54797  | -2.12481 | 1.10939  |
| H | 8.36052  | -2.38159 | 1.78431  |
| C | -3.15002 | -0.73874 | 1.02697  |

---

[a] The geometry was optimized by DFT calculation (B3LYP/6-31G\*, LanL2DZ ).

**Table S7.** Cartesian coordinates (in angstrom) of (*R*)-**1c** in the S<sub>0</sub> state<sup>[a]</sup>.

| atom | x        | y        | z        |
|------|----------|----------|----------|
| Pt   | 0.07362  | -0.54033 | 0.0081   |
| O    | -1.72547 | -0.57477 | -0.93526 |
| O    | 1.86841  | -0.62193 | 0.95291  |
| N    | -0.82025 | -0.56354 | 1.85233  |
| N    | 0.96227  | -0.40056 | -1.83146 |
| C    | -2.08302 | -0.80437 | 2.01904  |
| H    | -2.45005 | -0.79526 | 3.04841  |
| C    | -2.8692  | -0.93811 | -0.3989  |
| C    | -3.95361 | -1.17808 | -1.25073 |
| H    | -3.78682 | -1.07023 | -2.31873 |
| C    | 0.14011  | -0.05209 | -3.00748 |
| H    | -0.69167 | -0.75758 | -3.04348 |
| H    | 0.75492  | -0.183   | -3.90776 |
| C    | 2.23666  | -0.55629 | -2.01359 |
| H    | 2.59626  | -0.4657  | -3.0415  |
| C    | 3.03587  | -0.83566 | 0.38934  |
| C    | -0.02659 | -0.22204 | 3.05043  |
| H    | 0.81336  | -0.91834 | 3.09772  |
| H    | -0.66037 | -0.37409 | 3.93371  |
| C    | -0.51369 | 2.31409  | 2.75017  |
| H    | -1.03135 | 2.08293  | 1.81207  |
| H    | -1.28482 | 2.3254   | 3.53578  |
| C    | -5.22342 | -1.55068 | -0.77572 |
| C    | 0.52098  | 1.21522  | 3.02231  |
| H    | 1.01108  | 1.38813  | 3.99132  |
| H    | 1.30513  | 1.25967  | 2.26114  |
| C    | 3.26182  | -0.82622 | -1.03852 |
| C    | -3.08859 | -1.0751  | 1.0234   |
| C    | -4.35476 | -1.43343 | 1.49603  |
| H    | -4.5065  | -1.5201  | 2.57071  |
| C    | -0.42212 | 1.3776   | -2.94936 |
| H    | -1.02586 | 1.51417  | -3.85872 |
| H    | -1.1134  | 1.43034  | -2.10453 |
| C    | 0.14089  | 3.70036  | 2.6419   |
| H    | 0.53327  | 3.99402  | 3.62584  |
| H    | 1.01698  | 3.62337  | 1.98389  |
| C    | 5.65368  | -1.28472 | -0.70125 |
| C    | 5.43224  | -1.29099 | 0.72153  |
| C    | -6.32408 | -1.80464 | -1.64848 |

|   |          |          |          |
|---|----------|----------|----------|
| H | -6.17272 | -1.70516 | -2.72051 |
| C | 0.63224  | 2.48788  | -2.8621  |
| H | 1.34784  | 2.37879  | -3.6912  |
| H | 1.2154   | 2.36576  | -1.94097 |
| C | 4.1383   | -1.06481 | 1.22157  |
| H | 3.96535  | -1.06743 | 2.294    |
| C | -0.31817 | 4.33706  | -0.38713 |
| H | 0.45849  | 5.1169   | -0.36301 |
| H | 0.19258  | 3.38931  | -0.17516 |
| C | 7.80314  | -1.74963 | 1.04972  |
| H | 8.64331  | -1.93065 | 1.71533  |
| C | -6.72531 | -2.06594 | 1.12311  |
| H | -6.87152 | -2.16482 | 2.19659  |
| C | -1.35989 | 4.60884  | 0.70987  |
| H | -2.08293 | 3.78155  | 0.72093  |
| H | -1.93929 | 5.504    | 0.44142  |
| C | 6.55227  | -1.53121 | 1.57366  |
| H | 6.39614  | -1.53852 | 2.6496   |
| C | -5.43817 | -1.68779 | 0.64135  |
| C | 8.01845  | -1.74247 | -0.35717 |
| H | 9.01604  | -1.91735 | -0.74977 |
| C | -0.93879 | 4.28228  | -1.7915  |
| H | -1.37604 | 5.26405  | -2.0229  |
| H | -1.78149 | 3.5772   | -1.78536 |
| C | 0.04052  | 3.91041  | -2.92135 |
| H | 0.86878  | 4.63342  | -2.92703 |
| H | -0.47593 | 4.03413  | -3.8843  |
| C | 4.55141  | -1.04371 | -1.5348  |
| H | 4.70639  | -1.02574 | -2.61233 |
| C | -0.781   | 4.81886  | 2.12323  |
| H | -0.21487 | 5.76124  | 2.13585  |
| H | -1.61538 | 4.95778  | 2.82577  |
| C | 6.96595  | -1.51482 | -1.20855 |
| H | 7.11687  | -1.50687 | -2.28589 |
| C | -7.55112 | -2.1685  | -1.14908 |
| H | -8.37679 | -2.35788 | -1.83031 |
| C | -7.76002 | -2.30209 | 0.25223  |
| H | -8.73846 | -2.59069 | 0.62544  |

---

[a] The geometry was optimized by DFT calculation (B3LYP/6-31G\*, LanL2DZ ).

**Table S8.** Cartesian coordinates (in angstrom) of (*R*)-**1d** in the S<sub>0</sub> state<sup>[a]</sup>.

| atom | x        | y        | z        |
|------|----------|----------|----------|
| Pt   | -0.18294 | -0.86576 | -0.00517 |
| O    | 1.61682  | -0.9362  | 0.93516  |
| O    | -1.98317 | -0.89275 | -0.94313 |
| N    | 0.70122  | -1.07273 | -1.844   |
| N    | -1.05405 | -0.56895 | 1.824    |
| C    | 1.94039  | -1.42278 | -1.99138 |
| H    | 2.30392  | -1.51333 | -3.01813 |
| C    | 2.72658  | -1.42761 | 0.43012  |
| C    | 3.79635  | -1.67725 | 1.29756  |
| H    | 3.6461   | -1.46993 | 2.35326  |
| C    | -0.20815 | -0.20393 | 2.97796  |
| H    | 0.6082   | -0.92587 | 3.02266  |
| H    | -0.81217 | -0.29338 | 3.89062  |
| C    | -2.334   | -0.64526 | 2.01663  |
| H    | -2.68327 | -0.48307 | 3.03934  |
| C    | -3.15832 | -1.00829 | -0.36697 |
| C    | -0.0648  | -0.73897 | -3.06194 |
| H    | -0.9614  | -1.36215 | -3.06876 |
| H    | 0.55031  | -0.995   | -3.93431 |
| C    | 0.64774  | 1.75394  | -2.91076 |
| H    | 1.23419  | 1.46     | -2.03098 |
| H    | 1.33974  | 1.73513  | -3.76606 |
| C    | 5.03258  | -2.17877 | 0.85318  |
| C    | -0.48679 | 0.74007  | -3.10862 |
| H    | -0.98429 | 0.90398  | -4.07496 |
| H    | -1.24576 | 0.8899   | -2.33552 |
| C    | -3.37693 | -0.90795 | 1.05881  |
| C    | 2.92637  | -1.69525 | -0.97668 |
| C    | 4.15946  | -2.18272 | -1.4197  |
| H    | 4.2972   | -2.36622 | -2.48405 |
| C    | 0.38193  | 1.21162  | 2.86746  |
| H    | 1.03361  | 1.34943  | 3.74281  |
| H    | 1.03059  | 1.23948  | 1.98788  |
| C    | 0.12534  | 3.17984  | -2.67614 |
| H    | -0.32457 | 3.57995  | -3.59641 |
| H    | -0.68993 | 3.12689  | -1.93969 |
| C    | -5.79275 | -1.24574 | 0.75171  |
| C    | -5.5787  | -1.34332 | -0.66888 |
| C    | 6.11831  | -2.43959 | 1.74243  |

|   |          |          |          |
|---|----------|----------|----------|
| H | 5.98216  | -2.24234 | 2.80292  |
| C | -0.65522 | 2.3411   | 2.81972  |
| H | -1.32254 | 2.25722  | 3.69091  |
| H | -1.29025 | 2.21713  | 1.93194  |
| C | -4.27637 | -1.21972 | -1.18306 |
| H | -4.1096  | -1.29159 | -2.25405 |
| C | -7.97371 | -1.68239 | -0.96662 |
| H | -8.82618 | -1.8514  | -1.61964 |
| C | 6.48069  | -2.95288 | -0.99912 |
| H | 6.61179  | -3.14876 | -2.06117 |
| C | -6.71499 | -1.5657  | -1.50422 |
| H | -6.5651  | -1.6415  | -2.5784  |
| C | 5.22736  | -2.44557 | -0.5482  |
| C | -8.18151 | -1.58478 | 0.43804  |
| H | -9.18556 | -1.67999 | 0.84148  |
| C | -0.04476 | 3.75525  | 2.80222  |
| H | -0.86117 | 4.48687  | 2.8858   |
| H | 0.57995  | 3.89452  | 3.69746  |
| C | -4.67431 | -1.02359 | 1.56863  |
| H | -4.82246 | -0.93806 | 2.64389  |
| C | -7.11344 | -1.3713  | 1.27352  |
| H | -7.258   | -1.29501 | 2.34907  |
| C | 7.31284  | -2.92964 | 1.27287  |
| H | 8.12775  | -3.12148 | 1.96628  |
| C | 7.5021   | -3.19094 | -0.11312 |
| H | 8.45495  | -3.57795 | -0.46277 |
| C | 1.29429  | 5.52963  | 1.51979  |
| H | 0.43893  | 6.22212  | 1.51746  |
| H | 1.82216  | 5.7148   | 2.46617  |
| C | 0.6048   | 5.48178  | -1.66257 |
| H | 0.18853  | 6.0224   | -2.52482 |
| H | -0.25009 | 5.28125  | -1.00183 |
| C | 2.2488   | 5.87885  | 0.35441  |
| H | 2.87959  | 5.00702  | 0.1327   |
| H | 2.94185  | 6.65856  | 0.69804  |
| C | 1.59981  | 6.4079   | -0.94163 |
| H | 1.08393  | 7.35045  | -0.70775 |
| H | 2.40693  | 6.67325  | -1.6402  |
| C | 1.19222  | 4.14649  | -2.14234 |
| H | 1.71216  | 3.65579  | -1.30929 |
| H | 1.95768  | 4.33242  | -2.91015 |
| C | 0.78412  | 4.07785  | 1.54896  |



|   |         |         |         |
|---|---------|---------|---------|
| H | 1.64923 | 3.40322 | 1.49303 |
| H | 0.17656 | 3.8658  | 0.65995 |

---

[a] The geometry was optimized by DFT calculation (B3LYP/6-31G\*, LanL2DZ ).

**Table S9.** Cartesian coordinates (in angstrom) of (*R*)-**1e** in the S<sub>0</sub> state<sup>[a]</sup>.

| atom | x        | y        | z        |
|------|----------|----------|----------|
| Pt   | -0.23342 | -1.08055 | 0.19923  |
| O    | 1.57407  | -0.91016 | 1.10473  |
| O    | -2.04435 | -1.28579 | -0.69198 |
| N    | 0.61679  | -1.73186 | -1.55132 |
| N    | -1.07737 | -0.45754 | 1.96026  |
| C    | 2.92107  | -1.90226 | -0.66671 |
| C    | 2.72772  | -1.34388 | 0.65191  |
| C    | 3.84478  | -1.25433 | 1.49193  |
| H    | 3.69713  | -0.83077 | 2.4813   |
| C    | 5.12237  | -1.69257 | 1.10348  |
| C    | 6.25734  | -1.60711 | 1.96552  |
| H    | 6.12644  | -1.18502 | 2.95889  |
| C    | 7.49104  | -2.04854 | 1.5533   |
| H    | 8.34285  | -1.97497 | 2.22464  |
| C    | 7.67357  | -2.60353 | 0.25528  |
| H    | 8.65809  | -2.94645 | -0.04973 |
| C    | 6.60628  | -2.70187 | -0.60215 |
| H    | 6.73189  | -3.12393 | -1.59692 |
| C    | 5.31072  | -2.25502 | -0.20889 |
| C    | 4.19423  | -2.3352  | -1.05361 |
| H    | 4.32394  | -2.74976 | -2.05196 |
| C    | 1.87823  | -2.0201  | -1.65061 |
| H    | 2.21201  | -2.4025  | -2.61916 |
| C    | -3.42671 | -0.68021 | 1.22094  |
| C    | -3.2239  | -1.09931 | -0.14714 |
| C    | -4.36022 | -1.32312 | -0.93513 |
| H    | -4.20545 | -1.63871 | -1.96297 |
| C    | -5.66711 | -1.16142 | -0.44444 |
| C    | -6.82297 | -1.39328 | -1.25001 |
| H    | -6.68451 | -1.70527 | -2.28225 |
| C    | -8.0859  | -1.22774 | -0.73592 |
| H    | -8.95326 | -1.40954 | -1.36547 |
| C    | -8.27881 | -0.82028 | 0.61428  |
| H    | -9.28657 | -0.69558 | 1.00003  |
| C    | -7.19204 | -0.5875  | 1.41972  |
| H    | -7.3253  | -0.27552 | 2.45337  |
| C    | -5.86617 | -0.74922 | 0.921    |
| C    | -4.7286  | -0.52153 | 1.70871  |
| H    | -4.86436 | -0.20653 | 2.74198  |

|   |          |          |          |
|---|----------|----------|----------|
| C | -2.36042 | -0.39814 | 2.14539  |
| H | -2.69286 | -0.09061 | 3.13951  |
| C | -0.1839  | -1.90184 | -2.78896 |
| H | -1.20855 | -2.11529 | -2.48908 |
| H | 0.21301  | -2.77328 | -3.32396 |
| C | -0.12639 | -0.66452 | -3.70564 |
| H | 0.92323  | -0.35426 | -3.79684 |
| H | -0.43716 | -0.98164 | -4.71136 |
| C | -1.00417 | 0.5132   | -3.25501 |
| H | -0.89288 | 0.66556  | -2.17733 |
| H | -2.05698 | 0.23981  | -3.40218 |
| C | -0.71903 | 1.83245  | -3.99382 |
| H | -0.84566 | 1.6859   | -5.0767  |
| H | -1.48643 | 2.56051  | -3.69531 |
| C | 0.66827  | 2.45207  | -3.72952 |
| H | 1.45447  | 1.83546  | -4.18879 |
| H | 0.71282  | 3.42078  | -4.24573 |
| C | 0.994    | 4.42866  | 2.48578  |
| H | 1.88394  | 3.78526  | 2.53578  |
| H | 1.29587  | 5.38941  | 2.92785  |
| C | -0.13014 | 3.84585  | 3.36052  |
| H | -0.97034 | 4.55509  | 3.36461  |
| H | 0.22809  | 3.79536  | 4.39914  |
| C | -0.67303 | 2.45898  | 2.96742  |
| H | -1.48865 | 2.21814  | 3.66628  |
| H | -1.13318 | 2.50188  | 1.97206  |
| C | 0.3721   | 1.33352  | 3.00616  |
| H | 1.00889  | 1.45606  | 3.895    |
| H | 1.03628  | 1.37905  | 2.13782  |
| C | -0.2171  | -0.08338 | 3.10298  |
| H | 0.5962   | -0.80735 | 3.14524  |
| H | -0.81394 | -0.17082 | 4.02025  |
| C | 0.98898  | 2.63684  | -2.23822 |
| H | 0.14856  | 3.15103  | -1.75165 |
| H | 1.04908  | 1.65194  | -1.75953 |
| C | 0.6164   | 4.65812  | 1.01508  |
| H | 0.52042  | 3.69286  | 0.5022   |
| H | -0.37666 | 5.1299   | 0.96183  |
| C | 2.30106  | 3.38662  | -1.94881 |
| H | 3.09979  | 2.95488  | -2.56939 |
| H | 2.59835  | 3.18949  | -0.9101  |
| C | 1.62236  | 5.55062  | 0.26712  |

|   |         |         |          |
|---|---------|---------|----------|
| H | 2.63843 | 5.15562 | 0.41192  |
| H | 1.62022 | 6.53804 | 0.74853  |
| C | 1.33588 | 5.70983 | -1.24738 |
| H | 1.42514 | 6.7676  | -1.52693 |
| H | 0.28952 | 5.44212 | -1.44892 |
| C | 2.27138 | 4.90854 | -2.17533 |
| H | 2.00017 | 5.12306 | -3.21848 |
| H | 3.29363 | 5.29266 | -2.04712 |

---

[a] The geometry was optimized by DFT calculation (B3LYP/6-31G\*, LanL2DZ ).

**Table S10.** Cartesian coordinates (in angstrom) of (*R*)-**1f** in the S<sub>0</sub> state<sup>[a]</sup>.

| atom | x        | y        | z        |
|------|----------|----------|----------|
| Pt   | -0.55084 | -1.43596 | -0.15715 |
| O    | 1.18557  | -1.90172 | 0.78204  |
| N    | -2.29516 | -1.00009 | -1.09771 |
| C    | 0.3484   | -1.48178 | -2.00061 |
| C    | -1.44912 | -1.42026 | 1.68672  |
| C    | 2.53966  | -2.30507 | -1.20298 |
| H    | 2.31331  | -2.27596 | 0.22375  |
| C    | 3.36824  | -2.66427 | 1.05911  |
| C    | 3.19622  | -2.6365  | 2.13134  |
| H    | 4.61387  | -3.08395 | 0.56172  |
| C    | 5.68572  | -3.48322 | 1.41628  |
| H    | 5.53045  | -3.46009 | 2.49211  |
| C    | 6.89     | -3.88897 | 0.89487  |
| H    | 7.69391  | -4.1888  | 1.56233  |
| C    | 7.10385  | -3.92335 | -0.51198 |
| H    | 8.06413  | -4.24781 | -0.90253 |
| C    | 6.09714  | -3.54693 | -1.36571 |
| C    | 6.24753  | -3.56824 | -2.44295 |
| H    | 4.83374  | -3.12014 | -0.86113 |
| C    | 3.78035  | -2.72268 | -1.69721 |
| H    | 3.93616  | -2.73539 | -2.77469 |
| C    | 1.56725  | -1.88958 | -2.17822 |
| H    | 1.92282  | -1.91569 | -3.21202 |
| H    | -3.72966 | -0.92401 | 0.87012  |
| C    | -3.47462 | -0.82662 | -0.54886 |
| H    | -4.5585  | -0.53442 | -1.38691 |
| H    | -4.36581 | -0.46667 | -2.45384 |
| C    | -5.86132 | -0.33447 | -0.8997  |
| H    | -6.96328 | -0.03595 | -1.75723 |
| H    | -6.78539 | 0.03879  | -2.82721 |
| C    | -8.22377 | 0.1542   | -1.24572 |
| H    | -9.04961 | 0.38113  | -1.91518 |
| H    | -8.46798 | 0.05842  | 0.15339  |
| C    | -9.47286 | 0.21247  | 0.53603  |
| H    | -7.43401 | -0.22794 | 1.0095   |
| H    | -7.60678 | -0.3043  | 2.08087  |
| C    | -6.11236 | -0.43165 | 0.51504  |
| H    | -5.02787 | -0.72703 | 1.35362  |
| H    | -5.20315 | -0.80406 | 2.42539  |

|   |          |          |          |
|---|----------|----------|----------|
| C | -2.71948 | -1.21458 | 1.85299  |
| H | -3.08816 | -1.26567 | 2.88002  |
| H | -0.36997 | -1.04023 | -3.2209  |
| C | -1.43459 | -1.18029 | -3.04191 |
| H | -0.06425 | -1.69601 | -4.04563 |
| H | -0.06467 | 0.42294  | -3.58995 |
| C | 1.02573  | 0.54768  | -3.63468 |
| H | -0.43422 | 0.58717  | -4.61257 |
| H | -0.68831 | 1.46752  | -2.6534  |
| O | -0.45661 | 1.21032  | -1.61225 |
| N | -1.78042 | 1.40721  | -2.73872 |
| C | -0.22448 | 2.90996  | -2.91588 |
| C | -0.40792 | 3.1866   | -3.965   |
| C | -0.8487  | 3.5833   | -2.31167 |
| H | 1.23099  | 2.44864  | 4.1323   |
| C | 1.98873  | 1.70533  | 3.8477   |
| C | 1.69145  | 3.05585  | 4.92506  |
| H | 0.00061  | 1.74594  | 4.73223  |
| C | -0.72137 | 2.51347  | 5.04625  |
| H | 0.30925  | 1.2263   | 5.65104  |
| C | -0.72664 | 0.73396  | 3.82687  |
| H | -1.60071 | 0.36223  | 4.38285  |
| C | -1.12614 | 1.23996  | 2.93875  |
| H | 0.14182  | -0.45837 | 3.39761  |
| C | 0.73216  | -0.80742 | 4.25788  |
| C | 0.85869  | -0.16797 | 2.62411  |
| H | -0.64751 | -1.67991 | 2.90123  |
| C | 0.04802  | -2.48417 | 2.66335  |
| H | -1.32755 | -2.02527 | 3.69101  |
| C | 0.93352  | 3.35711  | 2.93032  |
| H | 0.60909  | 2.75093  | 2.07267  |
| H | 0.08727  | 4.01701  | 3.17474  |
| C | 2.1359   | 4.21884  | 2.51666  |
| H | 3.00342  | 3.56938  | 2.32654  |
| H | 2.42108  | 4.86622  | 3.35967  |
| C | 1.24985  | 3.158    | -2.55863 |
| H | 1.45942  | 2.67788  | -1.59039 |
| H | 1.9088   | 2.66455  | -3.28695 |
| C | 1.63185  | 4.64064  | -2.45451 |
| H | 1.45666  | 5.14616  | -3.41573 |
| H | 0.96027  | 5.12386  | -1.73221 |
| C | 1.86993  | 5.08208  | 1.27668  |

|   |         |         |          |
|---|---------|---------|----------|
| H | 1.64838 | 4.42248 | 0.42793  |
| H | 0.96025 | 5.67984 | 1.43832  |
| C | 3.094   | 4.83835 | -2.02632 |
| H | 3.7499  | 4.50721 | -2.84405 |
| H | 3.31528 | 4.16783 | -1.18412 |
| C | 3.47822 | 6.27633 | -1.64006 |
| H | 4.56751 | 6.31199 | -1.4947  |
| H | 3.26483 | 6.94723 | -2.48503 |
| C | 2.80851 | 6.85169 | -0.37444 |
| H | 3.20671 | 7.86481 | -0.23184 |
| H | 1.7307  | 6.98238 | -0.54356 |
| C | 3.02533 | 6.0328  | 0.92133  |
| H | 3.96207 | 5.46108 | 0.84295  |
| H | 3.16931 | 6.72078 | 1.7658   |

---

[a] The geometry was optimized by DFT calculation (B3LYP/6-31G\*, LanL2DZ ).

**Table S11.** Cartesian coordinates (in angstrom) of (*R*)-**1a** in the T<sub>1</sub> state<sup>[a]</sup>.

| atom | x         | y         | z         |
|------|-----------|-----------|-----------|
| Pt   | 0.022934  | -0.015046 | -0.00453  |
| O    | 1.796416  | -0.068207 | 0.895033  |
| O    | -1.73506  | -0.2712   | -0.896616 |
| N    | 0.914314  | 0.085372  | -1.836033 |
| N    | -0.883404 | 0.282221  | 1.797331  |
| C    | 3.184881  | -0.496315 | -1.067976 |
| C    | 2.943018  | -0.448373 | 0.362079  |
| C    | 3.972424  | -0.773923 | 1.248917  |
| H    | 3.754473  | -0.724999 | 2.311842  |
| C    | 5.263101  | -1.148567 | 0.805291  |
| C    | 6.307149  | -1.481184 | 1.703069  |
| H    | 6.108306  | -1.445565 | 2.771595  |
| C    | 7.557582  | -1.846892 | 1.235735  |
| H    | 8.348599  | -2.101113 | 1.935392  |
| C    | 7.806543  | -1.89022  | -0.153977 |
| H    | 8.790285  | -2.178073 | -0.515216 |
| C    | 6.809161  | -1.569311 | -1.057444 |
| H    | 7.005862  | -1.603934 | -2.126393 |
| C    | 5.516298  | -1.191983 | -0.611675 |
| C    | 4.469618  | -0.858536 | -1.499781 |
| H    | 4.670217  | -0.884998 | -2.568916 |
| C    | 2.204729  | -0.120396 | -2.031683 |
| H    | 2.56998   | 0.017936  | -3.050773 |
| C    | -3.144206 | -0.412426 | 1.096646  |
| C    | -2.888105 | -0.565107 | -0.323687 |
| C    | -3.911309 | -1.010104 | -1.163467 |
| H    | -3.683839 | -1.112912 | -2.22051  |
| C    | -5.207336 | -1.310837 | -0.683834 |
| C    | -6.247812 | -1.758849 | -1.536165 |
| H    | -6.040257 | -1.874384 | -2.597321 |
| C    | -7.503934 | -2.044807 | -1.033858 |
| H    | -8.29167  | -2.387696 | -1.698658 |
| C    | -7.766839 | -1.891121 | 0.346831  |
| H    | -8.756752 | -2.11719  | 0.734044  |
| C    | -6.77497  | -1.455708 | 1.205118  |
| H    | -6.979994 | -1.338684 | 2.266678  |
| C    | -5.474425 | -1.154297 | 0.722396  |
| C    | -4.432973 | -0.707911 | 1.564166  |
| H    | -4.640753 | -0.587176 | 2.625499  |



|   |           |          |           |
|---|-----------|----------|-----------|
| C | -2.168694 | 0.07575  | 2.014825  |
| H | -2.534266 | 0.311869 | 3.016568  |
| C | 0.145261  | 0.70984  | -2.923567 |
| H | -0.679761 | 0.044443 | -3.196383 |
| H | 0.803831  | 0.811239 | -3.795701 |
| C | -0.446529 | 2.083778 | -2.528377 |
| H | -1.28861  | 1.894046 | -1.858254 |
| H | -0.8777   | 2.526007 | -3.437439 |
| C | 0.531193  | 3.081955 | -1.873252 |
| H | 1.28857   | 2.540216 | -1.2959   |
| H | 1.081546  | 3.623733 | -2.654706 |
| C | -0.166592 | 4.106603 | -0.950968 |
| H | -0.986585 | 4.581247 | -1.508732 |
| H | 0.54289   | 4.913026 | -0.716275 |
| C | -0.731493 | 3.544127 | 0.372302  |
| H | -1.425426 | 4.285239 | 0.794669  |
| H | -1.337624 | 2.653542 | 0.169978  |
| C | 0.326393  | 3.21996  | 1.446017  |
| H | 0.816551  | 4.161468 | 1.73014   |
| H | 1.116777  | 2.585592 | 1.028682  |
| C | -0.243505 | 2.554146 | 2.725545  |
| H | 0.291269  | 2.943858 | 3.602398  |
| H | -1.294769 | 2.84702  | 2.857796  |
| C | -0.137938 | 1.013739 | 2.832358  |
| H | 0.906485  | 0.707085 | 2.766229  |
| H | -0.517873 | 0.706681 | 3.817096  |

---

[a] The geometry was optimized by DFT calculation (UB3LYP/6-31G\*, LanL2DZ ).

**Table S12.** Cartesian coordinates (in angstrom) of (*R*)-**1b** in the T<sub>1</sub> state<sup>[a]</sup>.

| atom | x         | y         | z         |
|------|-----------|-----------|-----------|
| Pt   | 0.000041  | 0.320774  | -0.000029 |
| O    | 1.773495  | 0.44293   | -0.886654 |
| O    | -1.773401 | 0.443049  | 0.886593  |
| N    | 0.869727  | 0.190249  | 1.841944  |
| N    | -0.869669 | 0.190085  | -1.841984 |
| C    | 2.938732  | 0.716789  | -0.332172 |
| C    | -2.161783 | 0.368646  | -2.049541 |
| H    | -2.50719  | 0.249445  | -3.077655 |
| C    | -0.062906 | -0.304835 | -2.968004 |
| H    | -0.677133 | -0.264201 | -3.877153 |
| H    | 0.789004  | 0.36652   | -3.102552 |
| C    | 3.171486  | 0.696237  | 1.098632  |
| C    | 4.471643  | 0.966323  | 1.551959  |
| H    | 4.663012  | 0.946417  | 2.62296   |
| C    | 0.606664  | -2.798727 | 2.462806  |
| H    | 1.30955   | -2.424171 | 1.708994  |
| H    | 1.199297  | -2.966716 | 3.373524  |
| C    | 0.465535  | -1.73598  | -2.744942 |
| H    | 1.034186  | -2.016904 | -3.643467 |
| H    | 1.187744  | -1.700989 | -1.924669 |
| C    | 0.062918  | -0.304496 | 2.968007  |
| H    | 0.67714   | -0.263864 | 3.877161  |
| H    | -0.788913 | 0.36697   | 3.102495  |
| C    | -2.938638 | 0.716885  | 0.332101  |
| C    | 2.161845  | 0.368777  | 2.049496  |
| H    | 2.507236  | 0.249666  | 3.077626  |
| C    | 5.545165  | 1.263485  | 0.683923  |
| C    | -0.539275 | -4.150666 | 0.548914  |
| H    | -1.161869 | -5.04761  | 0.41999   |
| H    | -1.214464 | -3.296105 | 0.41174   |
| C    | 6.855532  | 1.541407  | 1.151775  |
| H    | 7.044299  | 1.525493  | 2.222605  |
| C    | 0.538787  | -4.150818 | -0.548536 |
| H    | 1.16124   | -5.047845 | -0.419503 |
| H    | 1.214112  | -3.296347 | -0.411467 |
| C    | -6.855436 | 1.541472  | -1.151855 |
| H    | -7.044215 | 1.525474  | -2.222682 |
| C    | -3.993924 | 1.0107    | 1.19965   |
| H    | -3.781887 | 1.016638  | 2.264861  |

|   |           |           |           |
|---|-----------|-----------|-----------|
| C | -0.465709 | -1.735587 | 2.745034  |
| H | -1.034436 | -2.016356 | 3.643558  |
| H | -1.187881 | -1.700565 | 1.924726  |
| C | -4.471563 | 0.966304  | -1.55203  |
| H | -4.662946 | 0.946313  | -2.623026 |
| C | 5.301621  | 1.286231  | -0.735075 |
| C | 3.994037  | 1.010509  | -1.199726 |
| H | 3.782013  | 1.016365  | -2.264941 |
| C | -6.372753 | 1.583613  | 1.613413  |
| H | -6.181726 | 1.598675  | 2.683848  |
| C | -5.545067 | 1.263559  | -0.684001 |
| C | 0.018687  | -4.144038 | 1.988218  |
| H | -0.779935 | -4.444021 | 2.68183   |
| H | 0.793211  | -4.920134 | 2.066891  |
| C | -0.019176 | -4.144278 | -1.987839 |
| H | -0.793807 | -4.920278 | -2.066421 |
| H | 0.779402  | -4.444447 | -2.681421 |
| C | 7.879273  | 1.82884   | 0.267211  |
| H | 8.876409  | 2.039429  | 0.644559  |
| C | -7.639509 | 1.851087  | 1.124858  |
| H | -8.45136  | 2.078244  | 1.80986   |
| C | 6.372884  | 1.583335  | -1.613506 |
| H | 6.181872  | 1.598316  | -2.683944 |
| C | -5.301508 | 1.286415  | 0.734993  |
| C | -7.87916  | 1.828999  | -0.2673   |
| H | -8.876297 | 2.039579  | -0.644651 |
| C | -0.606977 | -2.798943 | -2.462578 |
| H | -1.199647 | -2.966957 | -3.373268 |
| H | -1.309801 | -2.424204 | -1.708798 |
| C | 7.639637  | 1.85082   | -1.124953 |
| H | 8.451501  | 2.077904  | -1.809963 |
| C | -3.171403 | 0.696222  | -1.098699 |

---

[a] The geometry was optimized by DFT calculation (UB3LYP/6-31G\*, LanL2DZ ).

**Table S13.** Cartesian coordinates (in angstrom) of (*R*)-**1c** in the T<sub>1</sub> state<sup>[a]</sup>.

| atom | x         | y         | z         |
|------|-----------|-----------|-----------|
| Pt   | -0.074366 | -0.642068 | 0.00639   |
| O    | 1.707033  | -0.69943  | 0.88067   |
| O    | -1.853561 | -0.776687 | -0.860778 |
| N    | 0.773122  | -0.663547 | -1.853241 |
| N    | -0.920493 | -0.450935 | 1.857793  |
| C    | 2.066918  | -0.84186  | -2.055544 |
| H    | 2.397829  | -0.832051 | -3.094978 |
| C    | 2.87866   | -0.963381 | 0.336127  |
| C    | 3.952188  | -1.147746 | 1.211842  |
| H    | 3.750497  | -1.077626 | 2.276771  |
| C    | -0.073243 | -0.114279 | 3.013512  |
| H    | 0.748899  | -0.832221 | 3.053089  |
| H    | -0.672718 | -0.234068 | 3.925651  |
| C    | -2.221703 | -0.531271 | 2.070961  |
| H    | -2.549113 | -0.404147 | 3.103723  |
| C    | -3.040303 | -0.883457 | -0.296733 |
| C    | -0.050851 | -0.359794 | -3.035024 |
| H    | -0.881129 | -1.070084 | -3.068348 |
| H    | 0.565679  | -0.518257 | -3.929163 |
| C    | 0.398451  | 2.191392  | -2.802495 |
| H    | 0.957937  | 1.967499  | -1.887044 |
| H    | 1.137748  | 2.216636  | -3.617406 |
| C    | 5.264582  | -1.413528 | 0.754795  |
| C    | -0.622788 | 1.070819  | -3.035944 |
| H    | -1.132225 | 1.216446  | -3.999745 |
| H    | -1.396895 | 1.128344  | -2.264228 |
| C    | -3.264742 | -0.766457 | 1.129569  |
| C    | 3.096937  | -1.046625 | -1.093619 |
| C    | 4.401649  | -1.308028 | -1.539967 |
| H    | 4.581867  | -1.368086 | -2.611393 |
| C    | 0.511735  | 1.308498  | 2.954368  |
| H    | 1.136935  | 1.435341  | 3.851018  |
| H    | 1.186656  | 1.361499  | 2.09548   |
| C    | -0.276516 | 3.565414  | -2.666322 |
| H    | -0.721797 | 3.848679  | -3.630638 |
| H    | -1.118152 | 3.474588  | -1.966096 |
| C    | -5.687969 | -1.091388 | 0.73805   |
| C    | -5.452244 | -1.212249 | -0.677273 |
| C    | 6.354041  | -1.601496 | 1.640777  |

|   |           |           |           |
|---|-----------|-----------|-----------|
| H | 6.17401   | -1.537165 | 2.711301  |
| C | -0.526504 | 2.435278  | 2.889612  |
| H | -1.207843 | 2.352045  | 3.749556  |
| H | -1.150224 | 2.304377  | 1.997021  |
| C | -4.123562 | -1.106409 | -1.151374 |
| H | -3.916172 | -1.192323 | -2.214004 |
| C | 0.317237  | 4.23636   | 0.339055  |
| H | -0.464332 | 5.011629  | 0.351549  |
| H | -0.198755 | 3.284907  | 0.158516  |
| C | -7.839684 | -1.53145  | -1.044799 |
| H | -8.673729 | -1.700441 | -1.719885 |
| C | 6.8082    | -1.765753 | -1.124675 |
| H | 6.986102  | -1.829479 | -2.195587 |
| C | 1.298654  | 4.50958   | -0.812016 |
| H | 2.029382  | 3.690055  | -0.855053 |
| H | 1.881076  | 5.412673  | -0.579068 |
| C | -6.552218 | -1.432281 | -1.54266  |
| H | -6.367147 | -1.522376 | -2.610444 |
| C | 5.493405  | -1.496848 | -0.6644   |
| C | -8.071685 | -1.412702 | 0.343594  |
| H | -9.085075 | -1.491169 | 0.728129  |
| C | 1.010013  | 4.192628  | 1.709771  |
| H | 1.470082  | 5.1722    | 1.903337  |
| H | 1.843721  | 3.477984  | 1.668578  |
| C | 0.088016  | 3.849336  | 2.89568   |
| H | -0.728661 | 4.58451   | 2.934081  |
| H | 0.656762  | 3.980296  | 3.827746  |
| C | -4.585155 | -0.873164 | 1.592912  |
| H | -4.769465 | -0.783939 | 2.661618  |
| C | 0.647396  | 4.703441  | -2.195698 |
| H | 0.063299  | 5.634861  | -2.182856 |
| H | 1.4438    | 4.855907  | -2.938352 |
| C | -7.019598 | -1.197473 | 1.215657  |
| H | -7.202307 | -1.106539 | 2.283779  |
| C | 7.62498   | -1.863311 | 1.159535  |
| H | 8.450908  | -2.006271 | 1.850408  |
| C | 7.850124  | -1.945376 | -0.232621 |
| H | 8.85036   | -2.151121 | -0.604391 |

---

[a] The geometry was optimized by DFT calculation (UB3LYP/6-31G\*, LanL2DZ ).

**Table S14.** Cartesian coordinates (in angstrom) of (*R*)-**1d** in the T<sub>1</sub> state<sup>[a]</sup>.

| atom | x         | y         | z         |
|------|-----------|-----------|-----------|
| Pt   | 0.084127  | -0.909402 | -0.112268 |
| O    | -1.699281 | -0.805679 | -0.975088 |
| O    | 1.871687  | -1.084463 | 0.732646  |
| N    | -0.762804 | -1.223998 | 1.722933  |
| N    | 0.922533  | -0.553721 | -1.943473 |
| C    | -3.10589  | -1.376786 | 0.933133  |
| C    | -2.886949 | -1.064169 | -0.463922 |
| C    | -3.973805 | -1.023929 | -1.341103 |
| H    | -3.772914 | -0.785349 | -2.381491 |
| C    | -5.298124 | -1.281408 | -0.916468 |
| C    | -6.40239  | -1.240932 | -1.804189 |
| H    | -6.223717 | -1.000334 | -2.849517 |
| C    | -7.684591 | -1.501833 | -1.355856 |
| H    | -8.52139  | -1.467744 | -2.047664 |
| C    | -7.909132 | -1.813726 | 0.004303  |
| H    | -8.91915  | -2.017512 | 0.349694  |
| C    | -6.854046 | -1.861243 | 0.896499  |
| H    | -7.030416 | -2.101373 | 1.942385  |
| C    | -5.526299 | -1.599345 | 0.469235  |
| C    | -4.421117 | -1.636202 | 1.346785  |
| H    | -4.599558 | -1.873012 | 2.393767  |
| C    | -2.059565 | -1.412225 | 1.897744  |
| H    | -2.379161 | -1.622575 | 2.92011   |
| C    | 3.282919  | -0.792655 | -1.232074 |
| C    | 3.065277  | -1.040702 | 0.177895  |
| C    | 4.161103  | -1.249799 | 1.021474  |
| H    | 3.96016   | -1.440319 | 2.071688  |
| C    | 5.495334  | -1.216917 | 0.550948  |
| C    | 6.606804  | -1.420833 | 1.404903  |
| H    | 6.427148  | -1.608486 | 2.460874  |
| C    | 7.899694  | -1.382879 | 0.910983  |
| H    | 8.742794  | -1.541031 | 1.577324  |
| C    | 8.123822  | -1.138375 | -0.461468 |
| H    | 9.140731  | -1.109564 | -0.843668 |
| C    | 7.059409  | -0.935804 | -1.322622 |
| H    | 7.237022  | -0.748123 | -2.378906 |
| C    | 5.723228  | -0.968417 | -0.848816 |
| C    | 4.608258  | -0.767691 | -1.692949 |
| H    | 4.787415  | -0.582557 | -2.750094 |

|   |           |           |           |
|---|-----------|-----------|-----------|
| C | 2.226159  | -0.572914 | -2.160451 |
| H | 2.544055  | -0.398676 | -3.189063 |
| C | 0.04499   | -1.226782 | 2.958373  |
| H | 1.068363  | -1.486551 | 2.69295   |
| H | -0.343442 | -2.014667 | 3.617716  |
| C | 0.009209  | 0.121143  | 3.704193  |
| H | -1.041077 | 0.391657  | 3.876321  |
| H | 0.452792  | -0.03713  | 4.698271  |
| C | 0.750374  | 1.265275  | 2.99753   |
| H | 0.412493  | 1.330594  | 1.956836  |
| H | 1.817435  | 1.01161   | 2.94487   |
| C | 0.592932  | 2.63485   | 3.684942  |
| H | 0.879522  | 2.540486  | 4.742618  |
| H | 1.315618  | 3.332895  | 3.242011  |
| C | -0.819122 | 3.250553  | 3.61074   |
| H | -1.539853 | 2.558368  | 4.066215  |
| H | -0.840517 | 4.154419  | 4.236673  |
| C | -1.306522 | 3.613702  | 2.195819  |
| H | -2.389178 | 3.799538  | 2.232435  |
| H | -1.178052 | 2.75129   | 1.528951  |
| C | -0.631367 | 4.852251  | 1.583319  |
| H | -0.912565 | 5.731     | 2.180586  |
| H | 0.462182  | 4.771428  | 1.661292  |
| C | -1.012234 | 5.084033  | 0.108355  |
| H | -0.868919 | 6.142298  | -0.150534 |
| H | -2.086866 | 4.885281  | -0.020468 |
| C | -0.206948 | 4.22767   | -0.883192 |
| H | -0.173009 | 3.186989  | -0.533662 |
| H | 0.83568   | 4.579791  | -0.886821 |
| C | -0.771102 | 4.27075   | -2.311224 |
| H | -1.733031 | 3.739469  | -2.330743 |
| H | -1.001962 | 5.313365  | -2.573894 |
| C | 0.166196  | 3.7075    | -3.395018 |
| H | 1.044428  | 4.364394  | -3.472597 |
| H | -0.345007 | 3.768989  | -4.366797 |
| C | 0.665576  | 2.266801  | -3.183483 |
| H | 1.346242  | 2.018852  | -4.011791 |
| H | 1.271002  | 2.218045  | -2.269937 |
| C | -0.443811 | 1.210243  | -3.113375 |
| H | -1.10446  | 1.308999  | -3.988023 |
| H | -1.069794 | 1.365459  | -2.22875  |
| C | 0.067118  | -0.241303 | -3.100536 |

|   |           |           |           |
|---|-----------|-----------|-----------|
| H | -0.784872 | -0.922012 | -3.086011 |
| H | 0.642249  | -0.437095 | -4.015501 |

---

[a] The geometry was optimized by DFT calculation (UB3LYP/6-31G\*, LanL2DZ ).



**Table S15.** Cartesian coordinates (in angstrom) of (*R*)-**1e** in the T<sub>1</sub> state<sup>[a]</sup>.

| atom | x         | y         | z         |
|------|-----------|-----------|-----------|
| Pt   | 0.264848  | -1.115039 | -0.284541 |
| O    | -1.52896  | -0.938088 | -1.112461 |
| O    | 2.065303  | -1.3337   | 0.518893  |
| N    | -0.540282 | -1.865242 | 1.440876  |
| N    | 1.060007  | -0.349744 | -2.006601 |
| C    | -2.88476  | -1.955108 | 0.63957   |
| C    | -2.698705 | -1.344495 | -0.660113 |
| C    | -3.798762 | -1.163433 | -1.502434 |
| H    | -3.622242 | -0.700613 | -2.469018 |
| C    | -5.105549 | -1.56079  | -1.135322 |
| C    | -6.223384 | -1.377611 | -1.987358 |
| H    | -6.069762 | -0.911657 | -2.957835 |
| C    | -7.487519 | -1.781942 | -1.597966 |
| H    | -8.335077 | -1.63567  | -2.261475 |
| C    | -7.679565 | -2.386924 | -0.3351   |
| H    | -8.675558 | -2.702025 | -0.035665 |
| C    | -6.610498 | -2.579953 | 0.520088  |
| H    | -6.76175  | -3.045459 | 1.491186  |
| C    | -5.300654 | -2.176982 | 0.151366  |
| C    | -4.182391 | -2.353494 | 0.994686  |
| H    | -4.336061 | -2.815807 | 1.967692  |
| C    | -1.824878 | -2.152574 | 1.569124  |
| H    | -2.121923 | -2.601736 | 2.518518  |
| C    | 3.434819  | -0.503604 | -1.317358 |
| C    | 3.24657   | -1.054386 | 0.008477  |
| C    | 4.359725  | -1.322419 | 0.811671  |
| H    | 4.180511  | -1.740951 | 1.797671  |
| C    | 5.682982  | -1.066193 | 0.380749  |
| C    | 6.811371  | -1.331136 | 1.194876  |
| H    | 6.653697  | -1.744513 | 2.188243  |
| C    | 8.093085  | -1.071463 | 0.740399  |
| H    | 8.949428  | -1.279795 | 1.3753    |
| C    | 8.288691  | -0.535047 | -0.551007 |
| H    | 9.296972  | -0.333153 | -0.902586 |
| C    | 7.207251  | -0.265025 | -1.371478 |
| H    | 7.362923  | 0.147916  | -2.365337 |
| C    | 5.881813  | -0.519426 | -0.936246 |
| C    | 4.750205  | -0.259751 | -1.741342 |
| H    | 4.907657  | 0.150106  | -2.736911 |

|   |           |           |           |
|---|-----------|-----------|-----------|
| C | 2.359934  | -0.213381 | -2.204825 |
| H | 2.658803  | 0.167612  | -3.181842 |
| C | 0.278488  | -2.117729 | 2.644537  |
| H | 1.306141  | -2.289096 | 2.327483  |
| H | -0.088113 | -3.040322 | 3.113523  |
| C | 0.212017  | -0.963759 | 3.665895  |
| H | -0.8426   | -0.689913 | 3.8004    |
| H | 0.553261  | -1.349416 | 4.637389  |
| C | 1.04856   | 0.26903   | 3.289286  |
| H | 0.927015  | 0.483036  | 2.222891  |
| H | 2.111405  | 0.025254  | 3.420677  |
| C | 0.72019   | 1.5352    | 4.100276  |
| H | 0.841108  | 1.329169  | 5.173936  |
| H | 1.468357  | 2.301516  | 3.852534  |
| C | -0.682353 | 2.128089  | 3.856575  |
| H | -1.453725 | 1.460406  | 4.266591  |
| H | -0.762233 | 3.061153  | 4.430971  |
| C | -1.138981 | 4.481797  | -2.26285  |
| H | -2.013762 | 3.819678  | -2.331371 |
| H | -1.476742 | 5.460447  | -2.634001 |
| C | -0.02576  | 3.985647  | -3.202532 |
| H | 0.792819  | 4.719684  | -3.18926  |
| H | -0.414882 | 3.985396  | -4.231289 |
| C | 0.568958  | 2.595784  | -2.908123 |
| H | 1.364698  | 2.4165    | -3.646596 |
| H | 1.063251  | 2.595135  | -1.928574 |
| C | -0.44505  | 1.443913  | -2.973972 |
| H | -1.098735 | 1.582481  | -3.848671 |
| H | -1.096283 | 1.447821  | -2.093756 |
| C | 0.182231  | 0.046291  | -3.121795 |
| H | -0.613489 | -0.694869 | -3.202328 |
| H | 0.771088  | 0.010161  | -4.048167 |
| C | -0.994622 | 2.395496  | 2.375827  |
| H | -0.162339 | 2.955595  | 1.926531  |
| H | -1.030957 | 1.438854  | 1.840611  |
| C | -0.729282 | 4.626927  | -0.789776 |
| H | -0.60161  | 3.633905  | -0.339929 |
| H | 0.255147  | 5.115482  | -0.72943  |
| C | -2.321439 | 3.133461  | 2.123034  |
| H | -3.112844 | 2.64827   | 2.712508  |
| H | -2.61013  | 2.992394  | 1.072883  |
| C | -1.735579 | 5.449563  | 0.03388   |

|   |           |          |           |
|---|-----------|----------|-----------|
| H | -2.747097 | 5.044854 | -0.116661 |
| H | -1.761546 | 6.465516 | -0.383107 |
| C | -1.423077 | 5.518012 | 1.54993   |
| H | -1.528938 | 6.553669 | 1.898045  |
| H | -0.367799 | 5.261133 | 1.715839  |
| C | -2.32473  | 4.639278 | 2.440254  |
| H | -2.043716 | 4.797463 | 3.490878  |
| H | -3.357473 | 5.005495 | 2.348917  |

---

[a] The geometry was optimized by DFT calculation (UB3LYP/6-31G\*, LanL2DZ ).

**Table S16.** Cartesian coordinates (in angstrom) of (*R*)-**1f** in the T<sub>1</sub> state<sup>[a]</sup>.

| atom | x         | y         | z         |
|------|-----------|-----------|-----------|
| Pt   | -0.549805 | -1.47249  | -0.168432 |
| O    | 1.182008  | -1.920039 | 0.688357  |
| O    | -2.293226 | -1.067652 | -1.024148 |
| N    | 0.305663  | -1.474312 | -2.02713  |
| N    | -1.395126 | -1.462152 | 1.694379  |
| C    | 2.549819  | -2.237666 | -1.30433  |
| C    | 2.330399  | -2.242687 | 0.126958  |
| C    | 3.372629  | -2.603742 | 0.98486   |
| H    | 3.172717  | -2.593131 | 2.052372  |
| C    | 4.650434  | -2.976944 | 0.506792  |
| C    | 5.709422  | -3.343501 | 1.374561  |
| H    | 5.532592  | -3.334085 | 2.447494  |
| C    | 6.945863  | -3.707759 | 0.872586  |
| H    | 7.748312  | -3.986851 | 1.549468  |
| C    | 7.16782   | -3.717961 | -0.523135 |
| H    | 8.1416    | -4.005303 | -0.910657 |
| C    | 6.156148  | -3.365302 | -1.397137 |
| H    | 6.33072   | -3.373665 | -2.470481 |
| C    | 4.876186  | -2.986529 | -0.915262 |
| C    | 3.81722   | -2.616306 | -1.772317 |
| H    | 3.995433  | -2.619174 | -2.845772 |
| C    | 1.554152  | -1.851211 | -2.24533  |
| H    | 1.873712  | -1.866746 | -3.288926 |
| C    | -3.700307 | -0.92878  | 0.960196  |
| C    | -3.469379 | -0.864456 | -0.467752 |
| C    | -4.53437  | -0.582341 | -1.329212 |
| H    | -4.326684 | -0.552464 | -2.39482  |
| C    | -5.845713 | -0.338551 | -0.856624 |
| C    | -6.923848 | -0.043777 | -1.726751 |
| H    | -6.73549  | -0.002648 | -2.796972 |
| C    | -8.195177 | 0.188742  | -1.230552 |
| H    | -9.012697 | 0.413849  | -1.909411 |
| C    | -8.430951 | 0.13328   | 0.16059   |
| H    | -9.430943 | 0.316817  | 0.544439  |
| C    | -7.399358 | -0.153075 | 1.037571  |
| H    | -7.58567  | -0.194938 | 2.108109  |
| C    | -6.085713 | -0.396282 | 0.561811  |
| C    | -5.004747 | -0.694003 | 1.421363  |
| H    | -5.193892 | -0.741716 | 2.491817  |

|   |           |           |           |
|---|-----------|-----------|-----------|
| C | -2.679752 | -1.233135 | 1.905324  |
| H | -3.013056 | -1.290267 | 2.941995  |
| C | -0.437009 | -1.04263  | -3.228322 |
| H | -1.499827 | -1.187657 | -3.040694 |
| H | -0.148401 | -1.700027 | -4.059248 |
| C | -0.152448 | 0.421547  | -3.61668  |
| H | 0.93582   | 0.558494  | -3.663876 |
| H | -0.527866 | 0.576687  | -4.638813 |
| C | -0.785333 | 1.462206  | -2.682244 |
| H | -0.556364 | 1.203175  | -1.640747 |
| H | -1.877784 | 1.399907  | -2.774616 |
| C | -0.327995 | 2.90901   | -2.932087 |
| H | -0.510321 | 3.192725  | -3.97938  |
| H | -0.956273 | 3.575113  | -2.323863 |
| C | 1.30616   | 2.361894  | 4.159114  |
| H | 2.06456   | 1.631374  | 3.844309  |
| H | 1.783028  | 2.967247  | 4.94356   |
| C | 0.103728  | 1.637064  | 4.789171  |
| H | -0.614651 | 2.392521  | 5.138798  |
| H | 0.449024  | 1.108352  | 5.689615  |
| C | -0.644368 | 0.631108  | 3.894125  |
| H | -1.495837 | 0.242534  | 4.472515  |
| H | -1.078315 | 1.145235  | 3.027309  |
| C | 0.217842  | -0.547429 | 3.418151  |
| H | 0.818347  | -0.921681 | 4.261295  |
| H | 0.927221  | -0.225675 | 2.648918  |
| C | -0.577093 | -1.752003 | 2.884987  |
| H | 0.117839  | -2.551866 | 2.627631  |
| H | -1.243137 | -2.126152 | 3.67418   |
| C | 0.962007  | 3.278189  | 2.975665  |
| H | 0.619853  | 2.676244  | 2.121939  |
| H | 0.115182  | 3.924962  | 3.251238  |
| C | 2.141195  | 4.158974  | 2.535796  |
| H | 3.01117   | 3.522271  | 2.315767  |
| H | 2.44195   | 4.802311  | 3.376482  |
| C | 1.144849  | 3.159383  | -2.570288 |
| H | 1.357701  | 2.665288  | -1.609829 |
| H | 1.805852  | 2.680827  | -3.306393 |
| C | 1.517959  | 4.642334  | -2.4429   |
| H | 1.329094  | 5.163967  | -3.392901 |
| H | 0.850971  | 5.107786  | -1.704669 |
| C | 1.831618  | 5.030589  | 1.311864  |

|   |          |          |           |
|---|----------|----------|-----------|
| H | 1.598103 | 4.377099 | 0.46136   |
| H | 0.918363 | 5.614283 | 1.502298  |
| C | 2.983379 | 4.842939 | -2.027787 |
| H | 3.631859 | 4.526922 | -2.857298 |
| H | 3.218302 | 4.162668 | -1.197224 |
| C | 3.362079 | 6.278505 | -1.627445 |
| H | 4.453298 | 6.322274 | -1.499833 |
| H | 3.128357 | 6.959058 | -2.45922  |
| C | 2.708826 | 6.829616 | -0.342712 |
| H | 3.093419 | 7.847522 | -0.196935 |
| H | 1.625819 | 6.944306 | -0.488618 |
| C | 2.965532 | 6.000597 | 0.939164  |
| H | 3.907523 | 5.442046 | 0.833558  |
| H | 3.120067 | 6.681744 | 1.787315  |

---

[a] The geometry was optimized by DFT calculation (UB3LYP/6-31G\*, LanL2DZ ).
